# Supplementary material for: Copper Complexes with N,N,N-Tridentate Quinolinyl Anilido-Imine Ligands: Synthesis and Their Catalytic Application in Chan−Lam Reactions
Source: MDPI journal article supplement (doi:10.3390/molecules28217406), 2023-11-03
Supplement: s1 [file s1]

## Supporting Information

### **Copper Complexes with N,N,N-Tridentate Quinolinyl Anilido-Imine Ligand: Synthesis and Their Catalytic Application in Chan–Lam Reactions**

**Xiaoyu Zhou <sup>1</sup>, Jiaxin Yang <sup>1</sup>, Guang Zeng <sup>2</sup>, Zhiqiang Hao <sup>1,\*</sup>, Zhan-Gang Han <sup>1</sup>, Jin Lin <sup>1,\*</sup> and Guo-Liang Lu <sup>3,\*</sup>**

<sup>1</sup> National Experimental Chemistry Teaching Center (Hebei Normal University), Hebei Key Laboratory of Organic Functional Molecules, College of Chemistry and Materials Science, Hebei Normal University, Shi-jiazhuang 050024, China.

<sup>2</sup> State Key Laboratory of Catalysis, Dalian Institute of Chemical and Physics, Chinese Academy of Sciences, Zhongshan Road 457, Dalian 116023, China.

<sup>3</sup> Auckland Cancer Society Research Centre, Faculty of Medical and Health Sciences and Maurice Wilkins Centre, The University of Auckland, Auckland 1142, New Zealand.

\* Correspondence: zqhao@hebtu.edu.cn; linjin@hebtu.edu.cn; gl.lu@auckland.ac.nz

### **Table of contents**

|                                                                      |     |
|----------------------------------------------------------------------|-----|
| 1. HR-MS spectra of copper complexes <b>2-5</b> .....                | S2  |
| 2. EPR spectra and the g values of copper complexes <b>2-5</b> ..... | S4  |
| 3. NMR data of catalytic products.....                               | S5  |
| 4. NMR spectra of catalytic products.....                            | S14 |

## 1. HR-MS spectra of copper complexes 2-5

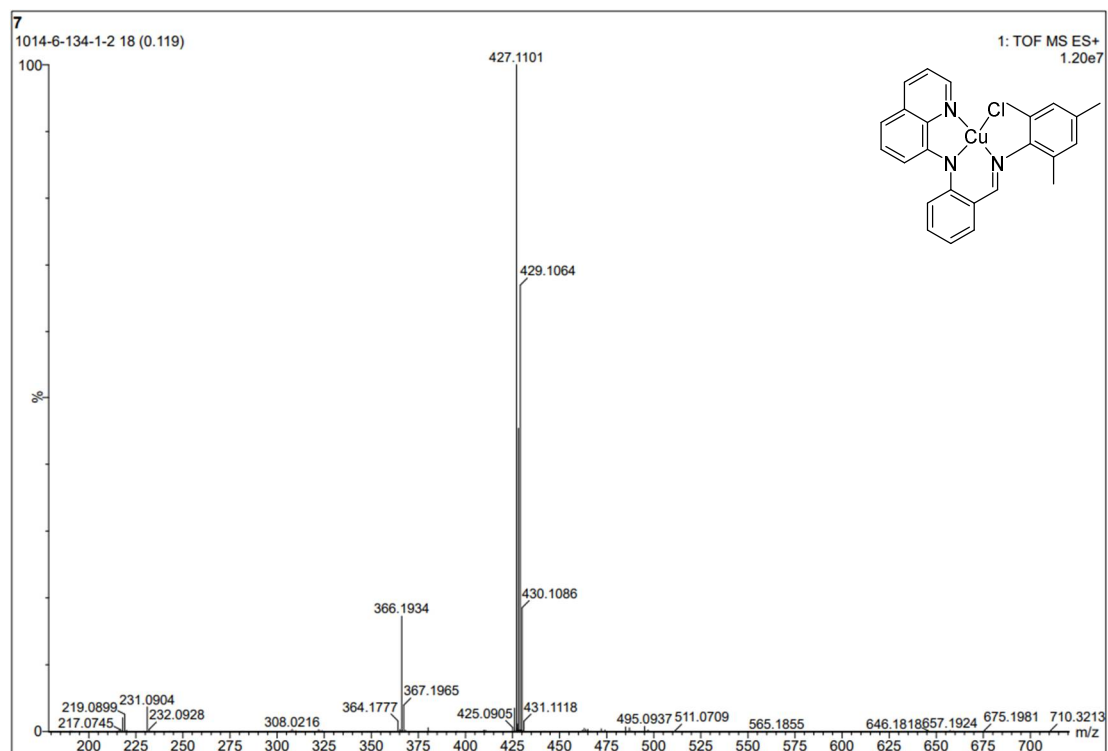

Figure S1. HR-MS spectra of **2**

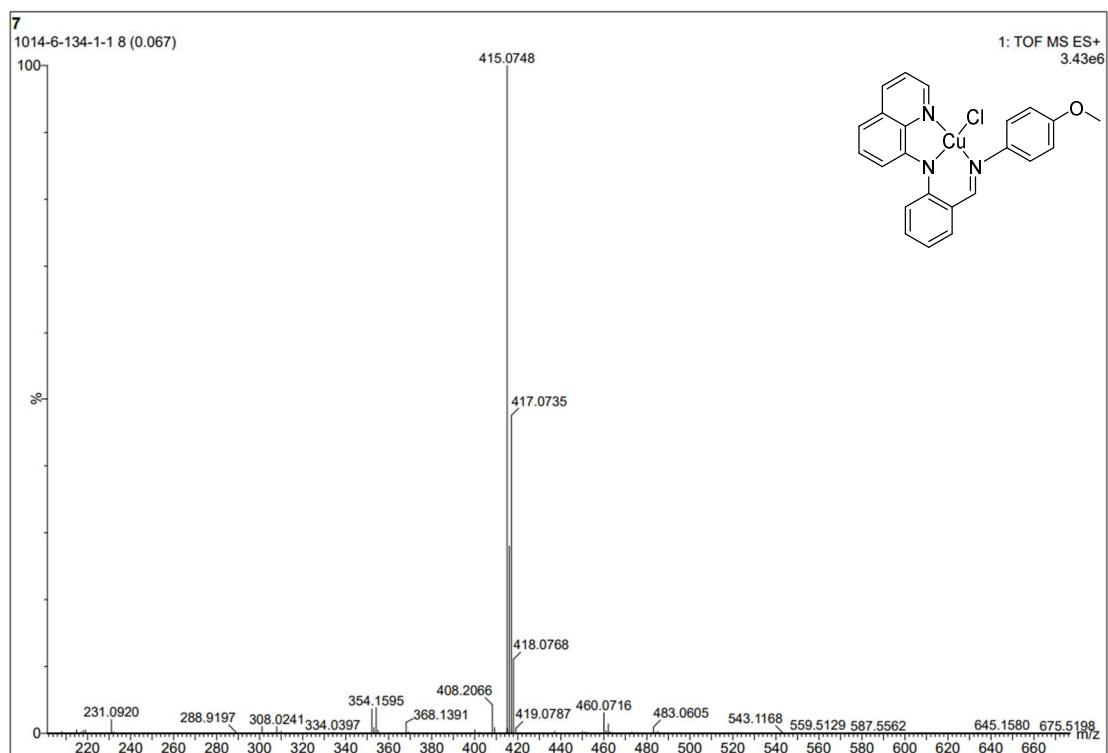

Figure S2. HR-MS spectra of **3**

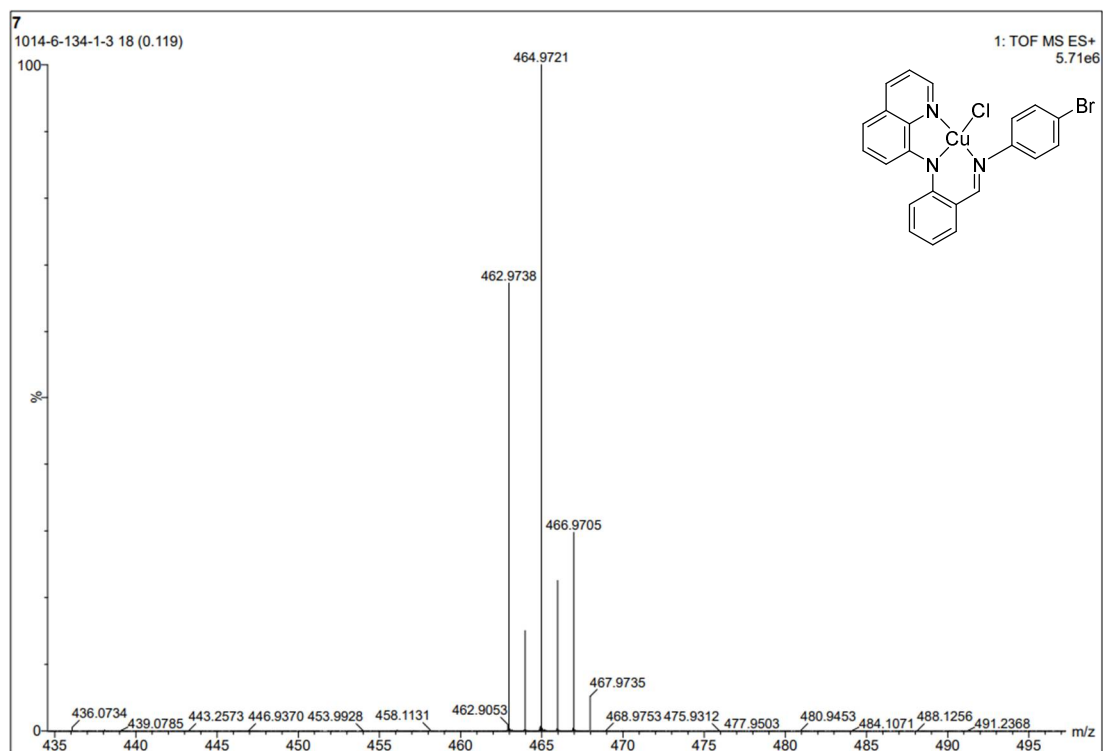

Figure S3. HR-MS spectra of **4**

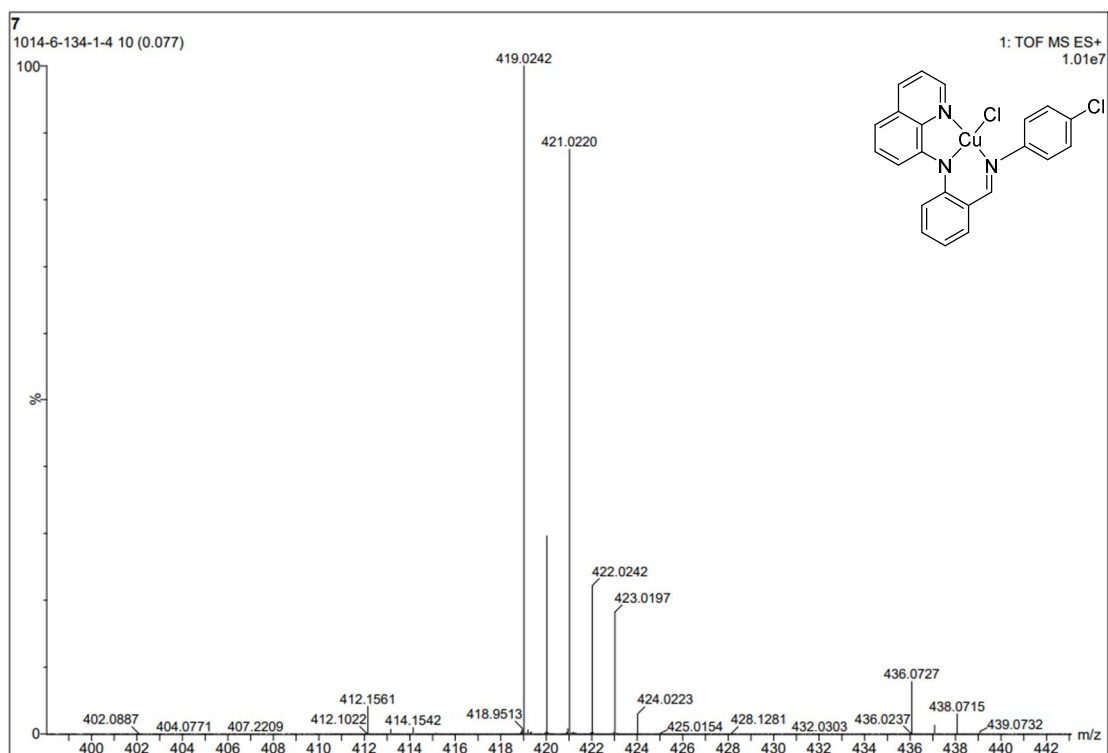

Figure S4. HR-MS spectra of **5**

## 2. EPR spectra and the g values of copper complexes 2-5

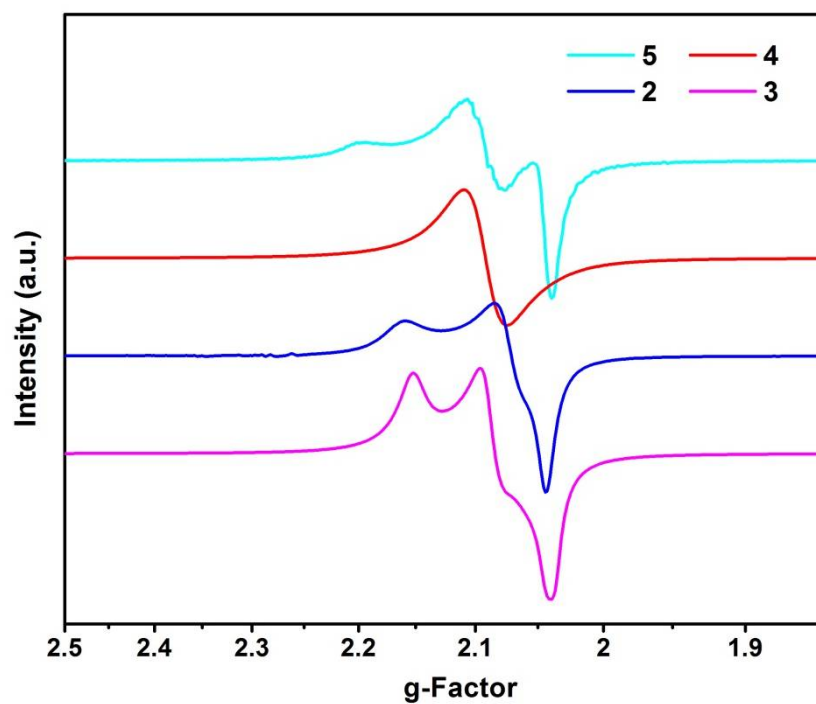

Figure S5. The g values of copper complexes 2-5

Table S1 The ESR parameters for the Cu<sup>II</sup> complexes 2-5

| Cu Complex | $g_x$ | $g_y$ | $g_z$ | $g_{iso}$ |
|------------|-------|-------|-------|-----------|
| 2          | 2.04  | 2.08  | 2.16  | —         |
| 3          | 2.04  | 2.09  | 2.15  | —         |
| 4          | —     | —     | —     | 2.09      |
| 5          | 2.04  | 2.05  | 2.11  | —         |

### 3. NMR data of catalytic products

#### 3.1 8a

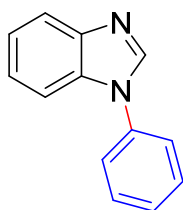

$^1\text{H}$  NMR (400 MHz,  $\text{CDCl}_3$ )  $\delta$  8.17 (s, 1H), 7.89 (d,  $J = 8.8$  Hz, 1H), 7.61 – 7.49 (m, 5H), 7.47 (t,  $J = 7.3$  Hz, 1H), 7.38 – 7.30 (m, 2H) ppm.

$^{13}\text{C}\{^1\text{H}\}$  NMR (101 MHz,  $\text{CDCl}_3$ )  $\delta$  143.8, 142.2, 136.3, 133.6, 130.0, 128.0, 124.0, 123.7, 122.8, 120.5, 110.4 ppm.

#### 3.2 8b

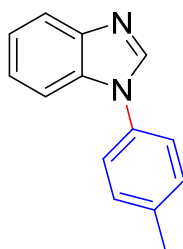

$^1\text{H}$  NMR (400 MHz,  $\text{CDCl}_3$ )  $\delta$  8.07 (s, 1H), 7.88 (d,  $J = 7.7$  Hz, 1H), 7.50 (d,  $J = 6.3$  Hz, 1H), 7.36 (t,  $J = 10.6$  Hz, 5H), 7.32 – 7.28 (m, 1H), 2.44 (s, 3H) ppm.

$^{13}\text{C}\{^1\text{H}\}$  NMR (101 MHz,  $\text{CDCl}_3$ )  $\delta$  143.9, 142.3, 138.0, 133.7, 133.7, 130.4, 123.8, 123.4, 122.5, 120.4, 110.4, 21.0 ppm.

#### 3.3 8c

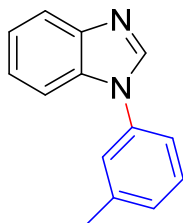

$^1\text{H}$  NMR (400 MHz,  $\text{CDCl}_3$ )  $\delta$  8.09 (s, 1H), 7.87 (dd,  $J = 5.4, 2.8$  Hz, 1H), 7.55 – 7.50 (m, 1H), 7.43 (t,  $J = 7.6$  Hz, 1H), 7.36 – 7.23 (m, 5H), 2.45 (s, 3H) ppm.

$^{13}\text{C}\{^1\text{H}\}$  NMR (101 MHz,  $\text{CDCl}_3$ )  $\delta$  143.9, 142.3, 140.2, 136.2, 133.7, 129.8, 128.7, 124.6, 123.6, 122.7, 121.0, 120.5, 110.5, 21.4 ppm.

### 3.4 8d

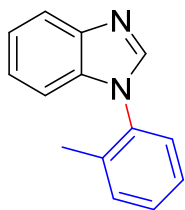

$^1\text{H}$  NMR (400 MHz,  $\text{CDCl}_3$ )  $\delta$  7.97 (s, 1H), 7.89 (d,  $J = 7.8$  Hz, 1H), 7.42 (s, 2H), 7.39 – 7.27 (m, 4H), 7.13 (d,  $J = 7.8$  Hz, 1H), 2.10 (s, 3H) ppm.

$^{13}\text{C}\{^1\text{H}\}$  NMR (101 MHz,  $\text{CDCl}_3$ )  $\delta$  143.2, 142.9, 135.3, 134.7, 131.5, 129.3, 128.8, 127.6, 127.1, 123.5, 122.4, 120.3, 110.4, 17.5 ppm.

### 3.5 8e

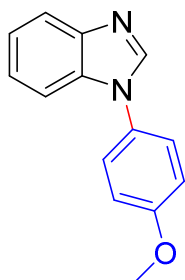

$^1\text{H}$  NMR (400 MHz,  $\text{CDCl}_3$ )  $\delta$  8.05 (s, 1H), 7.87 (d,  $J = 7.2$  Hz, 1H), 7.44 (t,  $J = 7.0$  Hz, 1H), 7.42 – 7.37 (m, 2H), 7.35 – 7.28 (m, 2H), 7.10 – 7.02 (m, 2H), 3.88 (s, 3H) ppm.

$^{13}\text{C}\{^1\text{H}\}$  NMR (101 MHz,  $\text{CDCl}_3$ )  $\delta$  159.3, 143.7, 142.5, 134.2, 129.1, 125.7, 123.5, 122.6, 120.4, 115.1, 110.3, 55.6 ppm.

### 3.6 8f

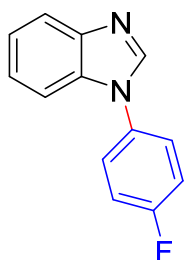

$^1\text{H}$  NMR (400 MHz,  $\text{CDCl}_3$ )  $\delta$  8.06 (s, 1H), 7.90 – 7.85 (m, 1H), 7.47 (dt,  $J = 9.1, 4.6$  Hz, 3H), 7.36 – 7.30 (m, 2H), 7.26 (t,  $J = 8.4$  Hz, 2H) ppm.

$^{13}\text{C}\{^1\text{H}\}$  NMR (101 MHz,  $\text{CDCl}_3$ )  $\delta$  163.1, 143.8, 142.2, 126.0, 125.9, 123.8,

122.8, 120.6, 117.1, 116.8, 110.1 ppm.

$^{19}\text{F}$  NMR (376 MHz,  $\text{CDCl}_3$ )  $\delta$  -112.8 ppm.

**3.7 8g**

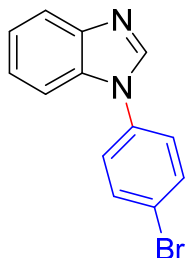

$^1\text{H}$  NMR (400 MHz,  $\text{CDCl}_3$ )  $\delta$  8.06 (s, 1H), 7.87 (dd,  $J$  = 4.9, 3.9 Hz, 1H), 7.67 (d,  $J$  = 8.5 Hz, 2H), 7.50 – 7.44 (m, 1H), 7.41 – 7.29 (m, 4H) ppm.

$^{13}\text{C}\{^1\text{H}\}$  NMR (101 MHz,  $\text{CDCl}_3$ )  $\delta$  143.9, 141.8, 135.2, 133.3, 133.1, 125.4, 123.8, 122.9, 121.5, 120.6, 110.1 ppm.

**3.8 8h**

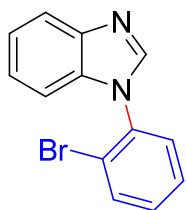

$^1\text{H}$  NMR (400 MHz,  $\text{CDCl}_3$ )  $\delta$  8.03 (s, 1H), 7.88 (d,  $J$  = 7.6 Hz, 1H), 7.80 (d,  $J$  = 8.0 Hz, 1H), 7.49 (t,  $J$  = 7.5 Hz, 1H), 7.39 (ddd,  $J$  = 12.3, 6.4, 5.0 Hz, 2H), 7.35 – 7.26 (m, 2H), 7.18 (d,  $J$  = 7.9 Hz, 1H) ppm.

$^{13}\text{C}\{^1\text{H}\}$  NMR (101 MHz,  $\text{CDCl}_3$ )  $\delta$  143.1, 142.8, 135.0, 134.2, 134.1, 130.5, 129.0, 128.6, 123.6, 122.6, 121.3, 120.3, 110.4 ppm.

**3.9 8i**

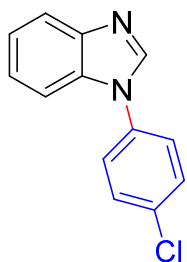

$^1\text{H}$  NMR (400 MHz,  $\text{CDCl}_3$ )  $\delta$  8.06 (s, 1H), 7.87 (dd,  $J$  = 4.4, 2.9 Hz, 1H), 7.56 –

7.49 (m, 2H), 7.49 – 7.45 (m, 1H), 7.42 (dd,  $J = 8.6, 2.4$  Hz, 2H), 7.35 – 7.29 (m, 2H) ppm.

$^{13}\text{C}\{^1\text{H}\}$  NMR (101 MHz,  $\text{CDCl}_3$ )  $\delta$  143.9, 141.9, 134.7, 133.7, 133.4, 130.1, 125.1, 123.8, 122.9, 120.6, 110.1 ppm.

### 3.10 8j

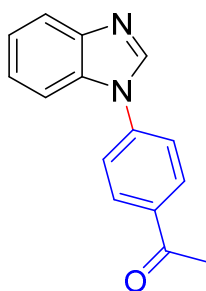

$^1\text{H}$  NMR (400 MHz,  $\text{CDCl}_3$ )  $\delta$  8.14 (d,  $J = 2.5$  Hz, 3H), 7.95 – 7.77 (m, 1H), 7.66 – 7.49 (m, 3H), 7.38 – 7.28 (m, 2H), 2.64 (s, 3H) ppm.

$^{13}\text{C}\{^1\text{H}\}$  NMR (101 MHz,  $\text{CDCl}_3$ )  $\delta$  196.5, 144.1, 141.7, 140.0, 136.0, 132.9, 130.2, 124.0, 123.2, 120.7, 110.3, 26.6 ppm.

### 3.11 8k

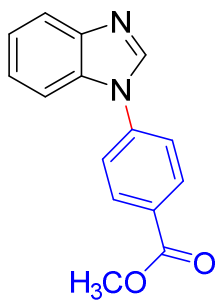

$^1\text{H}$  NMR (400 MHz,  $\text{CDCl}_3$ )  $\delta$  8.23 (d,  $J = 8.4$  Hz, 2H), 8.15 (s, 1H), 7.87 (dd,  $J = 6.2, 2.7$  Hz, 1H), 7.57 (dd,  $J = 12.2, 5.9$  Hz, 3H), 7.34 (dd,  $J = 5.9, 3.2$  Hz, 2H), 3.95 (s, 3H) ppm.

$^{13}\text{C}\{^1\text{H}\}$  NMR (101 MHz,  $\text{CDCl}_3$ )  $\delta$  165.9, 144.2, 141.8, 140.1, 133.0, 131.5, 129.3, 124.0, 123.1, 120.8, 110.4, 52.3 ppm.

### 3.12 8l



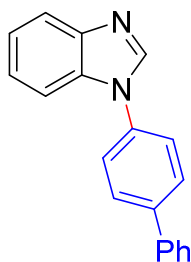

$^1\text{H}$  NMR (400 MHz,  $\text{CDCl}_3$ )  $\delta$  8.16 (s, 1H), 7.94 – 7.90 (m, 1H), 7.78 (d,  $J = 8.4$  Hz, 2H), 7.65 (d,  $J = 7.4$  Hz, 2H), 7.62 – 7.55 (m, 3H), 7.50 (t,  $J = 7.5$  Hz, 2H), 7.42 (t,  $J = 7.4$  Hz, 1H), 7.38 – 7.34 (m, 2H) ppm.

$^{13}\text{C}\{^1\text{H}\}$  NMR (101 MHz,  $\text{CDCl}_3$ )  $\delta$  144.2, 142.3, 141.1, 139.8, 135.5, 133.8, 129.1, 128.7, 128.0, 127.2, 124.3, 123.8, 122.9, 120.7, 110.6 ppm.

### 3.13 8m

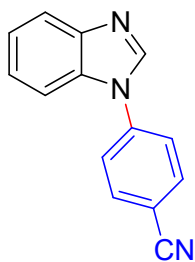

$^1\text{H}$  NMR (400 MHz,  $\text{CDCl}_3$ )  $\delta$  8.15 (s, 1H), 7.88 (d,  $J = 7.1$  Hz, 3H), 7.67 (d,  $J = 7.1$  Hz, 2H), 7.59 – 7.53 (m, 1H), 7.41 – 7.34 (m, 2H) ppm.

$^{13}\text{C}\{^1\text{H}\}$  NMR (101 MHz,  $\text{CDCl}_3$ )  $\delta$  144.2, 141.5, 140.0, 134.1, 132.7, 124.4, 123.8, 123.5, 121.0, 117.8, 111.4, 110.2 ppm.

### 3.14 8n

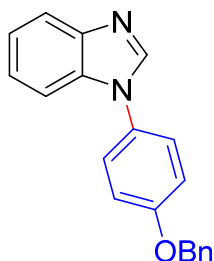

$^1\text{H}$  NMR (400 MHz,  $\text{CDCl}_3$ )  $\delta$  8.05 (s, 1H), 7.89 (d,  $J = 7.9$  Hz, 1H), 7.42 (ddd,  $J = 24.6, 10.5, 4.3$  Hz, 8H), 7.35 – 7.30 (m, 2H), 7.14 (d,  $J = 8.6$  Hz, 2H), 5.14 (s, 2H) ppm.

$^{13}\text{C}\{^1\text{H}\}$  NMR (101 MHz,  $\text{CDCl}_3$ )  $\delta$  158.3, 143.7, 142.4, 136.3, 134.1, 129.2, 128.6, 128.1, 127.4, 125.6, 123.4, 122.5, 120.4, 115.9, 110.3, 70.3 ppm.

**3.15 8o**

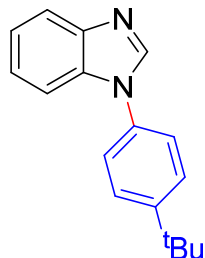

$^1\text{H}$  NMR (400 MHz,  $\text{CDCl}_3$ )  $\delta$  8.10 (s, 1H), 7.88 (d,  $J = 8.5$  Hz, 1H), 7.63 – 7.52 (m, 3H), 7.44 (d,  $J = 8.4$  Hz, 2H), 7.37 – 7.30 (m, 2H), 1.40 (s, 9H) ppm.

$^{13}\text{C}\{^1\text{H}\}$  NMR (101 MHz,  $\text{CDCl}_3$ )  $\delta$  151.2, 143.9, 142.3, 133.7, 126.9, 123.6, 123.5, 122.6, 120.5, 110.5, 31.3 ppm.

**3.16 8p**

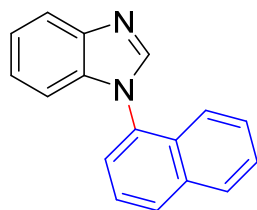

$^1\text{H}$  NMR (400 MHz,  $\text{CDCl}_3$ )  $\delta$  8.12 (s, 1H), 8.04 – 7.91 (m, 3H), 7.56 (dt,  $J = 17.5, 7.4$  Hz, 3H), 7.42 (d,  $J = 13.2$  Hz, 2H), 7.34 (t,  $J = 7.6$  Hz, 1H), 7.22 (t,  $J = 7.6$  Hz, 1H), 7.07 (d,  $J = 8.0$  Hz, 1H) ppm.

$^{13}\text{C}\{^1\text{H}\}$  NMR (101 MHz,  $\text{CDCl}_3$ )  $\delta$  143.7, 143.3, 135.6, 134.3, 132.2, 129.7, 129.6, 128.4, 127.4, 126.9, 125.4, 124.8, 123.5, 122.6, 122.4, 120.4, 110.7 ppm.

**3.17 8s**

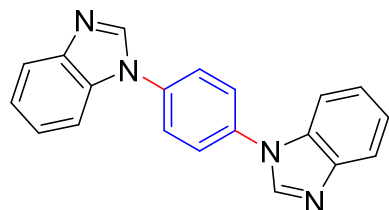

$^1\text{H}$  NMR (400 MHz,  $\text{CDCl}_3$ )  $\delta$  8.20 (s, 2H), 7.96 – 7.90 (m, 2H), 7.77 (s, 4H), 7.64 – 7.59 (m, 2H), 7.40 (dd,  $J = 6.0, 3.1$  Hz, 4H) ppm.

$^{13}\text{C}\{^1\text{H}\}$  NMR (101 MHz,  $\text{CDCl}_3$ )  $\delta$  144.1, 142.0, 135.9, 133.5, 128.7, 125.6, 124.1, 123.2, 120.9, 110.2 ppm.

### 3.18 8t/8t'

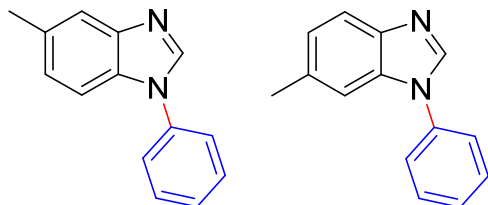

$^1\text{H}$  NMR (400 MHz,  $\text{CDCl}_3$ )  $\delta$  8.05 (d,  $J = 10.2$  Hz, 1H), 7.75 (d,  $J = 8.0$  Hz, 0.5H), 7.66 (s, 0.5H), 7.54 (s, 2H), 7.51 – 7.39 (m, 4H), 7.32 (s, 0.5H), 7.15 (s, 1H), 2.49 (d,  $J = 11.6$  Hz, 3H) ppm.

$^{13}\text{C}\{^1\text{H}\}$  NMR (101 MHz,  $\text{CDCl}_3$ )  $\delta$  144.3, 142.0, 141.7, 136.4, 136.3, 133.8, 133.6, 132.4, 131.6, 129.9, 127.8, 127.7, 125.1, 124.3, 123.9, 123.7, 120.2, 119.9, 110.2, 109.9, 21.7, 21.4 ppm.

### 3.19 8u/8u'

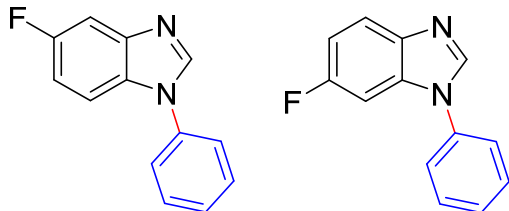

$^1\text{H}$  NMR (400 MHz,  $\text{CDCl}_3$ )  $\delta$  8.10 (d,  $J = 11.9$  Hz, 1H), 7.78 (dd,  $J = 8.8, 4.8$  Hz, 0.5H), 7.62 – 7.39 (m, 6H), 7.19 (dd,  $J = 8.7, 1.9$  Hz, 0.5H), 7.07 (t,  $J = 8.8$  Hz, 1H) ppm.

$^{13}\text{C}\{^1\text{H}\}$  NMR (101 MHz,  $\text{CDCl}_3$ )  $\delta$  161.4, 160.6, 159.0, 158.3, 144.5, 143.5, 142.8, 140.3, 136.0, 135.9, 133.8, 133.7, 130.1, 130.1, 128.3, 128.2, 123.9, 123.8, 121.4, 121.2, 112.1, 111.9, 111.3, 111.1, 110.9, 110.8, 106.3, 106.1, 97.3, 97.0 ppm.

$^{19}\text{F}$  NMR (376 MHz,  $\text{CDCl}_3$ )  $\delta$  -117.5, -120.0 ppm.

### 3.20 8v

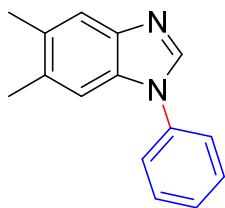

$^1\text{H}$  NMR (400 MHz,  $\text{CDCl}_3$ )  $\delta$  8.00 (s, 1H), 7.64 (s, 1H), 7.54 (d,  $J = 6.8$  Hz, 2H), 7.50 – 7.44 (m, 2H), 7.43 (s, 1H), 7.31 (s, 1H), 2.38 (d,  $J = 12.0$  Hz, 6H) ppm.

$^{13}\text{C}\{^1\text{H}\}$  NMR (101 MHz,  $\text{CDCl}_3$ )  $\delta$  142.6, 141.4, 136.5, 132.8, 132.0, 131.5, 129.8, 127.6, 123.7, 120.4, 110.4, 20.5, 20.1 ppm.

### 3.21 8w

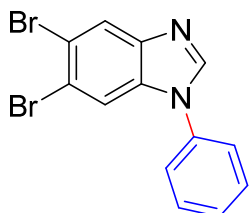

$^1\text{H}$  NMR (400 MHz,  $\text{CDCl}_3$ )  $\delta$  8.14 (s, 1H), 8.08 (s, 1H), 7.80 (s, 1H), 7.60 (t,  $J = 7.6$  Hz, 2H), 7.51 (t,  $J = 6.2$  Hz, 1H), 7.47 (d,  $J = 7.4$  Hz, 2H) ppm.

$^{13}\text{C}\{^1\text{H}\}$  NMR (101 MHz,  $\text{CDCl}_3$ )  $\delta$  144.3, 143.9, 135.4, 133.9, 130.3, 128.7, 125.0, 124.1, 119.2, 118.2, 115.0 ppm.

### 3.22 8x

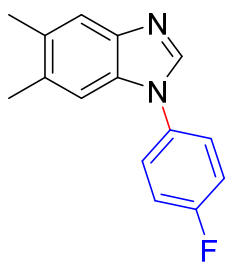

$^1\text{H}$  NMR (400 MHz,  $\text{CDCl}_3$ )  $\delta$  7.95 (s, 1H), 7.62 (s, 1H), 7.51 – 7.38 (m, 2H), 7.25 (dd,  $J = 11.8, 5.6$  Hz, 3H), 2.38 (d,  $J = 11.2$  Hz, 6H) ppm.

$^{13}\text{C}\{^1\text{H}\}$  NMR (101 MHz,  $\text{CDCl}_3$ )  $\delta$  163.1, 160.6, 142.5, 141.5, 133.1, 132.7, 132.4, 131.9, 125.9, 120.6, 117.1, 116.9, 110.3, 20.6, 20.3 ppm.

$^{19}\text{F}$  NMR (376 MHz,  $\text{CDCl}_3$ )  $\delta$  -113.2 ppm.

### 3.23 8y

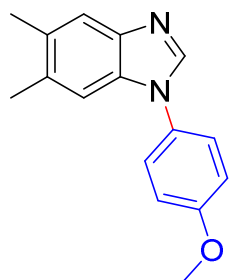

$^1\text{H}$  NMR (400 MHz,  $\text{CDCl}_3$ )  $\delta$  7.93 (s, 1H), 7.62 (s, 1H), 7.38 (d,  $J = 8.6$  Hz, 2H), 7.22 (s, 1H), 7.05 (d,  $J = 8.7$  Hz, 2H), 3.87 (s, 3H), 2.37 (d,  $J = 14.2$  Hz, 6H) ppm.

$^{13}\text{C}\{^1\text{H}\}$  NMR (101 MHz,  $\text{CDCl}_3$ )  $\delta$  159.0, 142.3, 141.6, 132.6, 131.4, 129.4, 125.4, 120.3, 114.9, 110.3, 55.5, 20.4, 20.2 ppm.

#### 4. NMR spectra of catalytic products

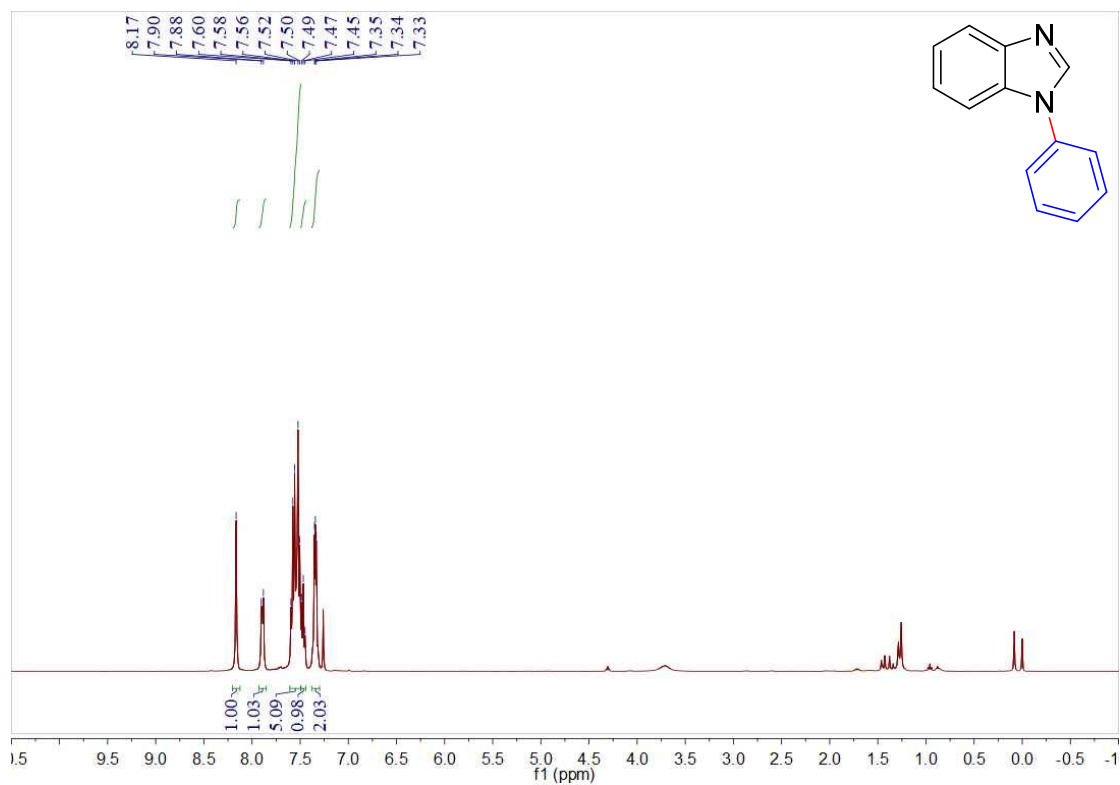

Figure S6. <sup>1</sup>H NMR spectra of **8a**

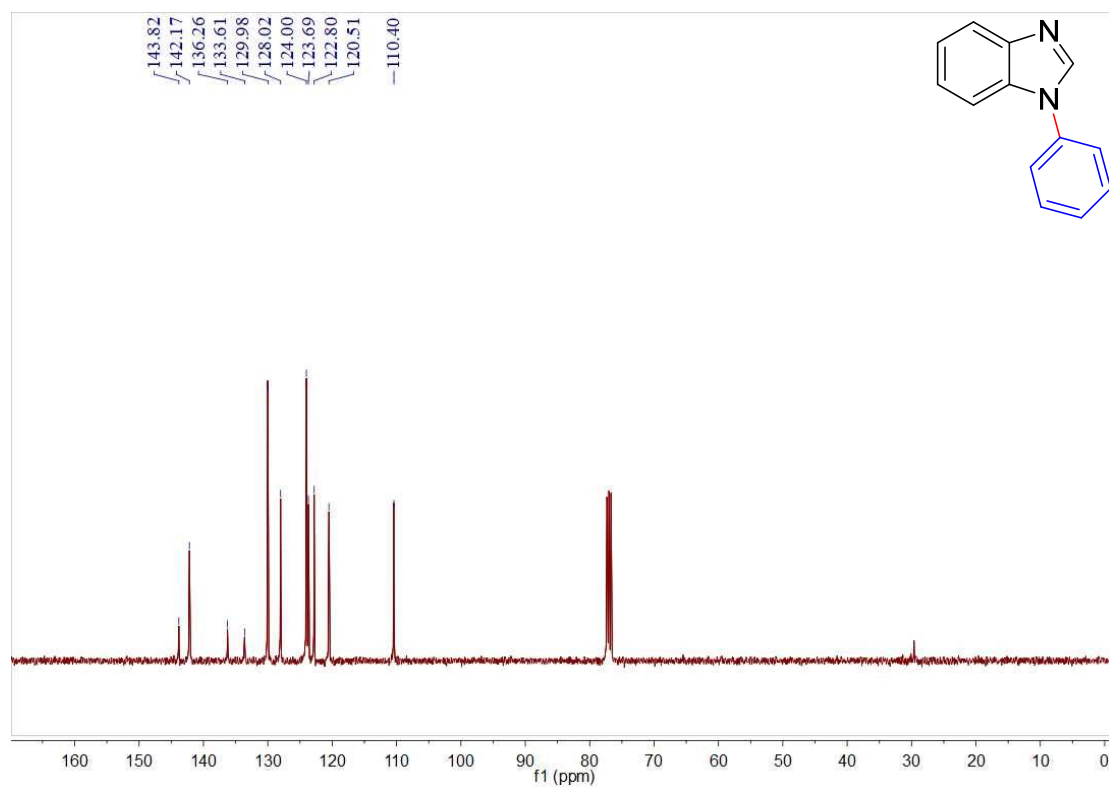

Figure S7. <sup>13</sup>C{<sup>1</sup>H} NMR spectra of **8a**

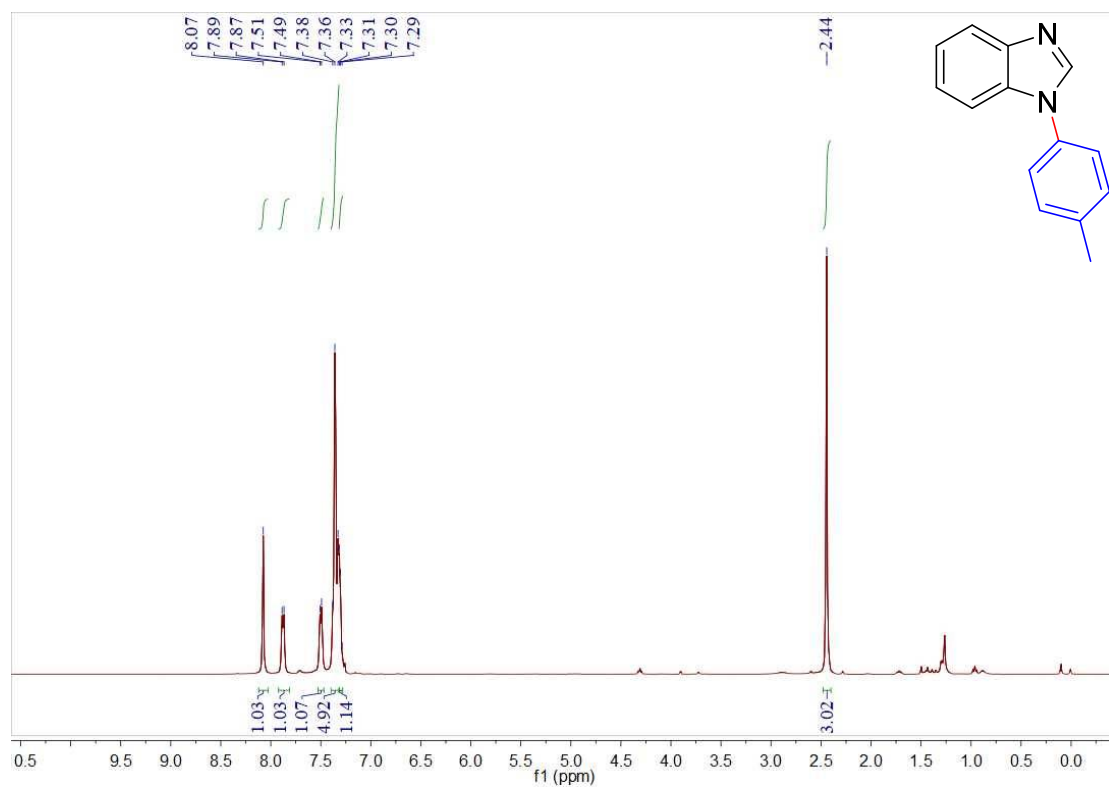

Figure S8. <sup>1</sup>H NMR spectra of **8b**

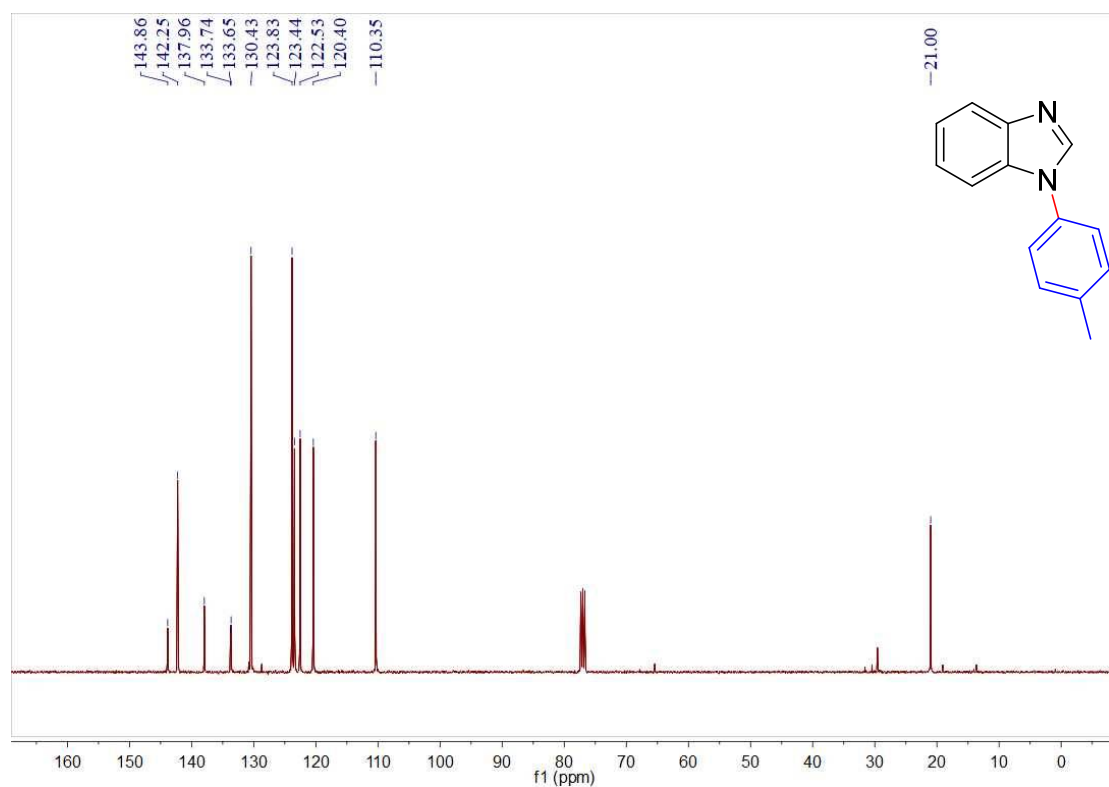

Figure S9. <sup>13</sup>C{<sup>1</sup>H} NMR spectra of **8b**

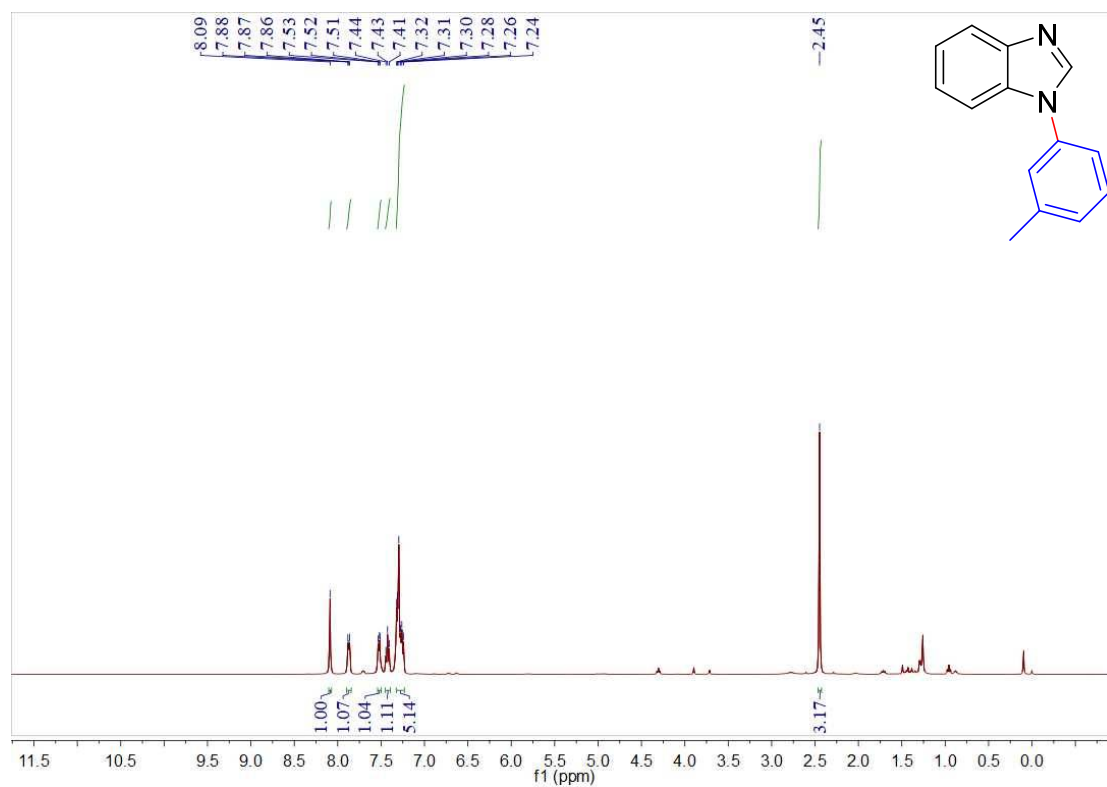

**Figure S10.** <sup>1</sup>H NMR spectra of **8c**

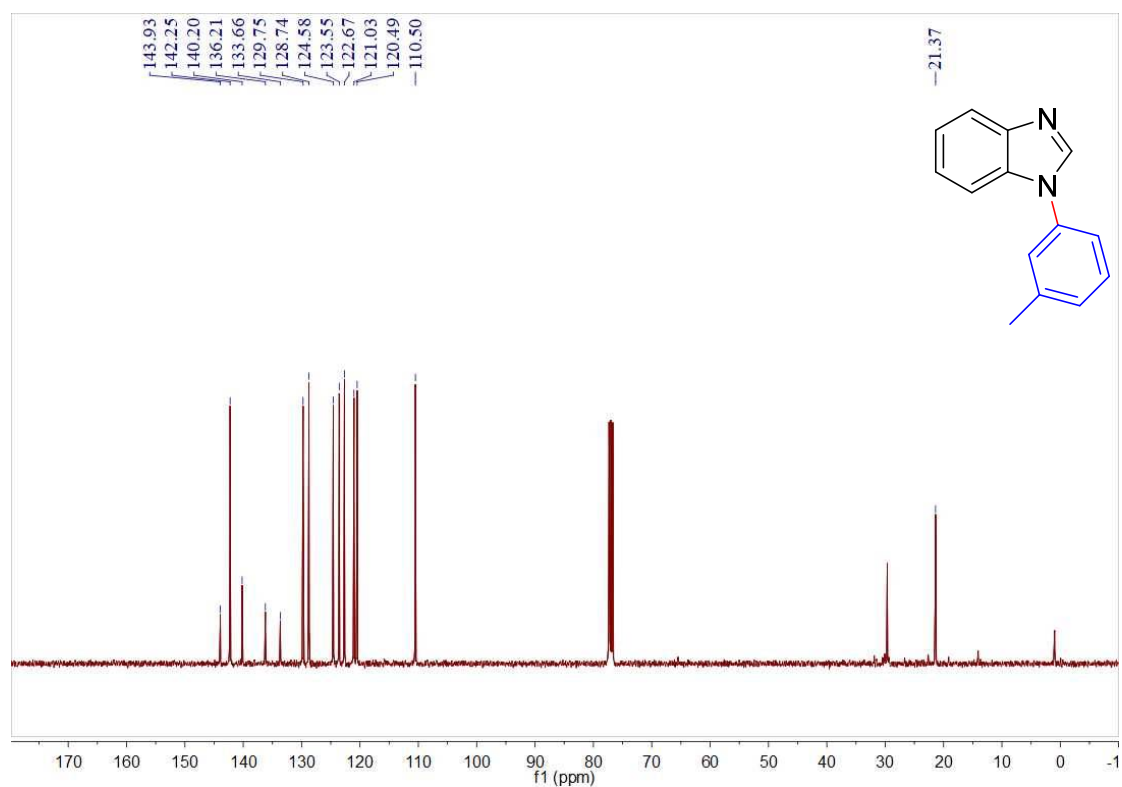

**Figure S11.** <sup>13</sup>C{<sup>1</sup>H} NMR spectra of **8c**



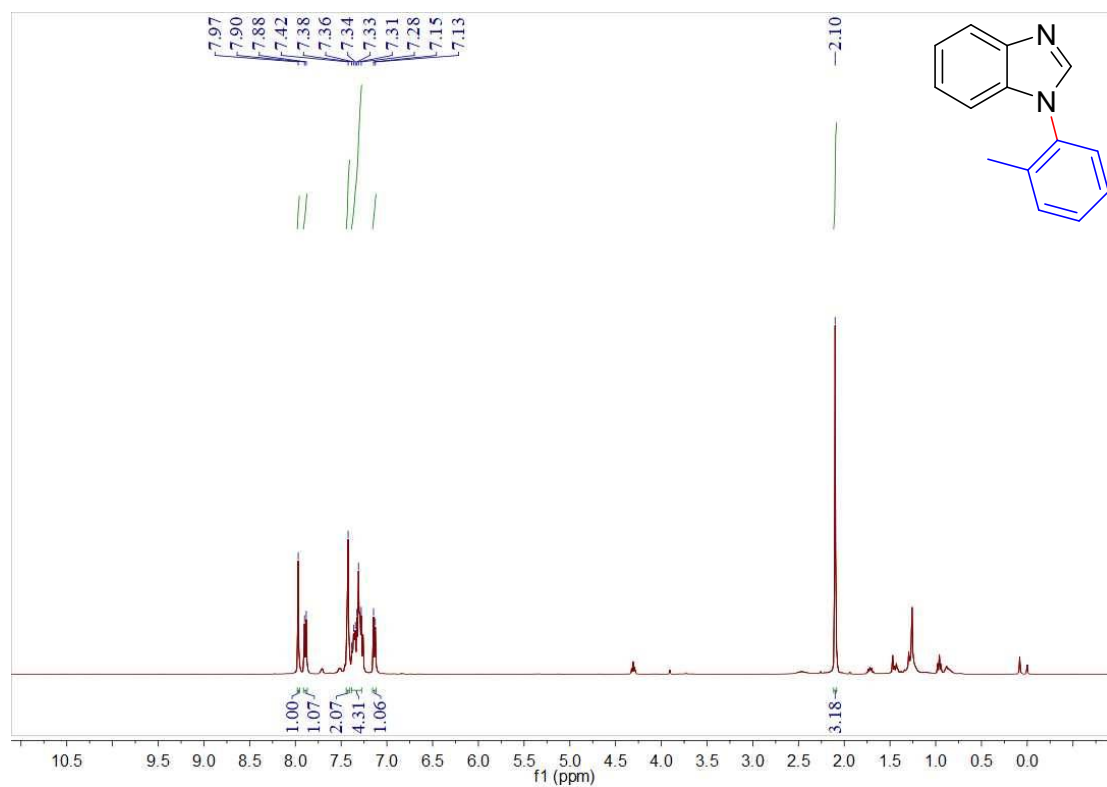

**Figure S12.** <sup>1</sup>H NMR spectra of **8d**

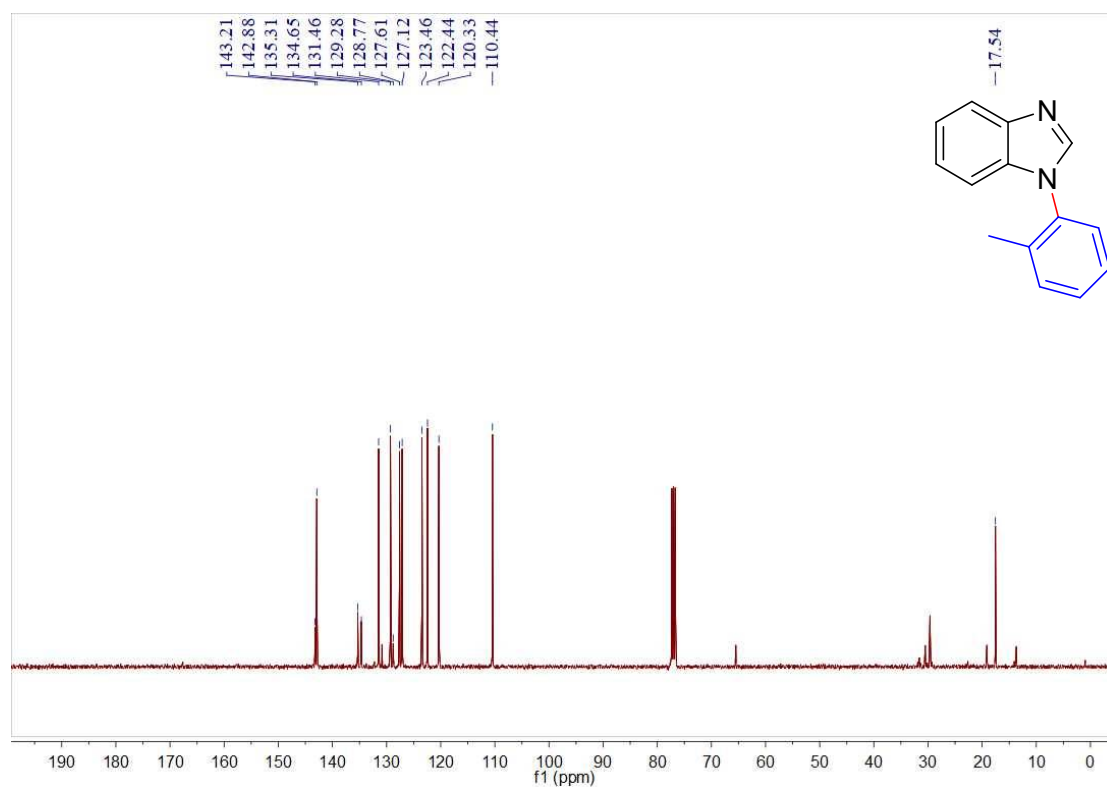

**Figure S13.** <sup>13</sup>C{<sup>1</sup>H} NMR spectra of **8d**

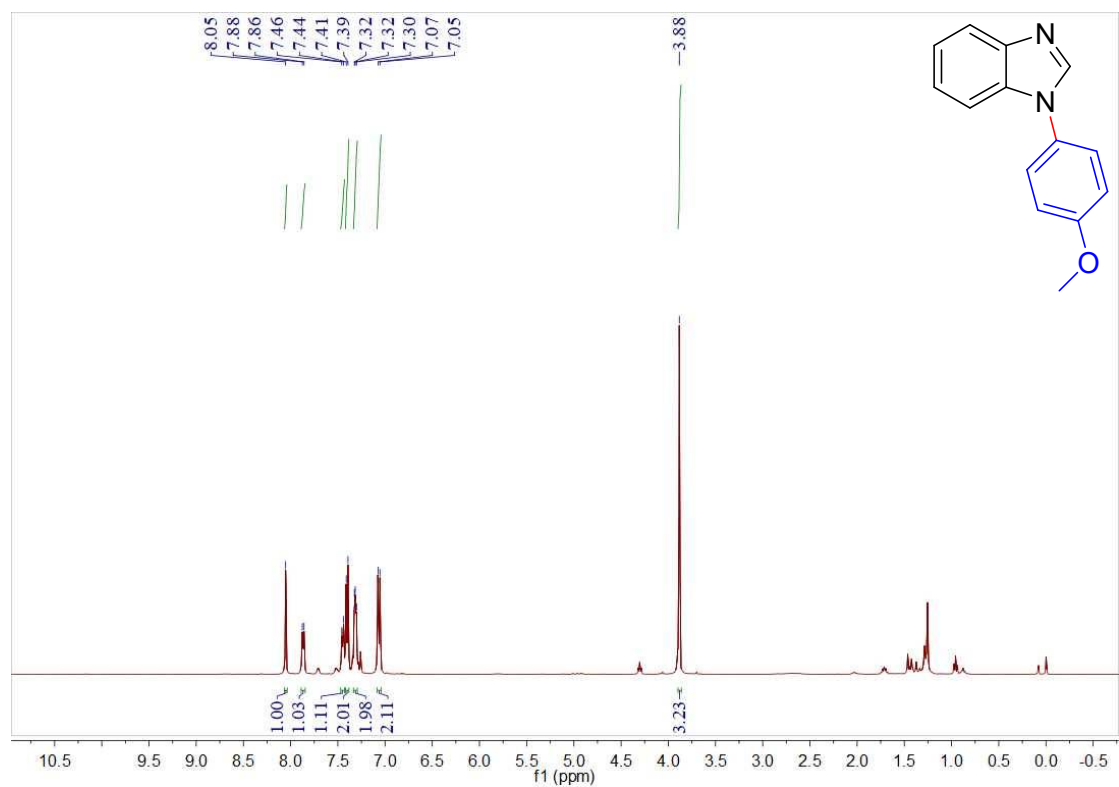

Figure S14. <sup>1</sup>H NMR spectra of **8e**

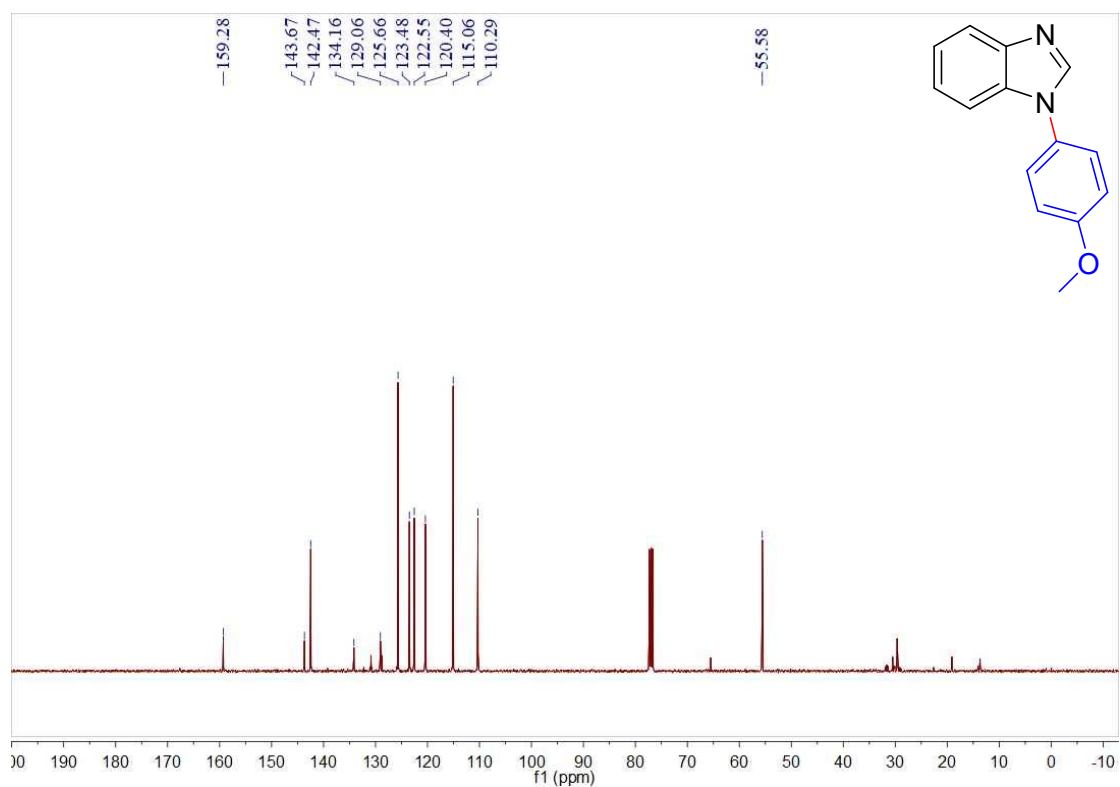

Figure S15. <sup>13</sup>C{<sup>1</sup>H} NMR spectra of **8e**

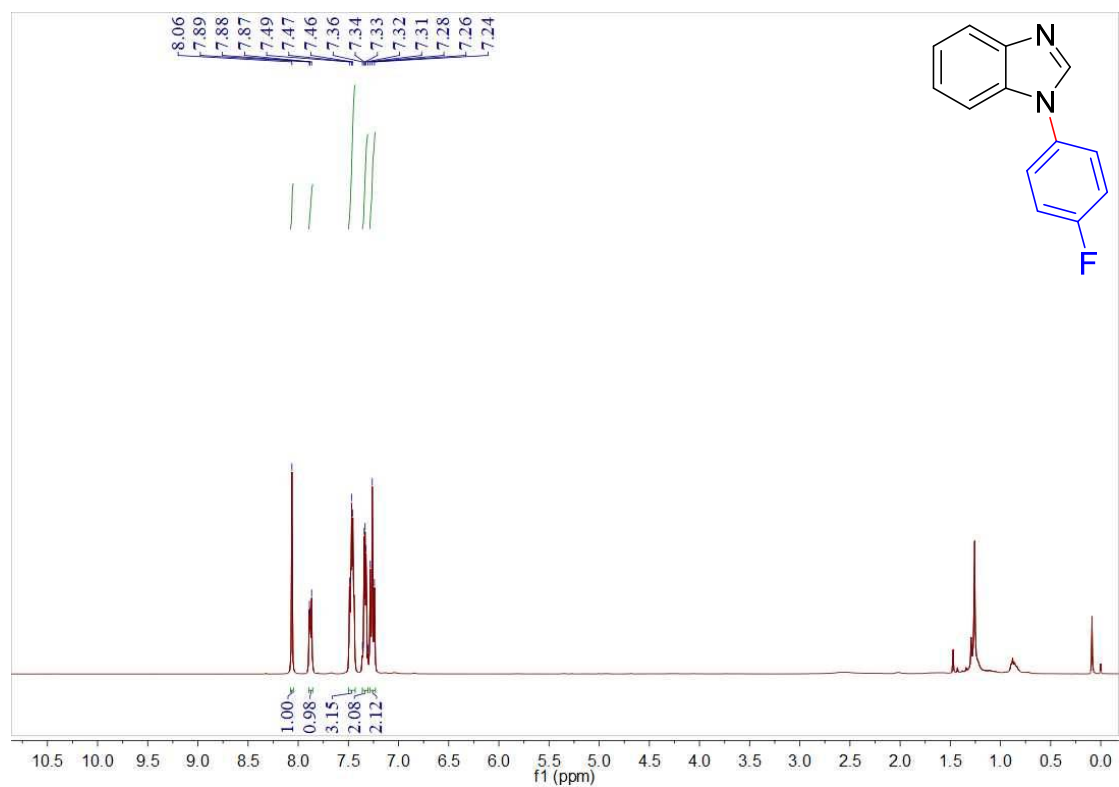

**Figure S16.** <sup>1</sup>H NMR spectra of **8f**

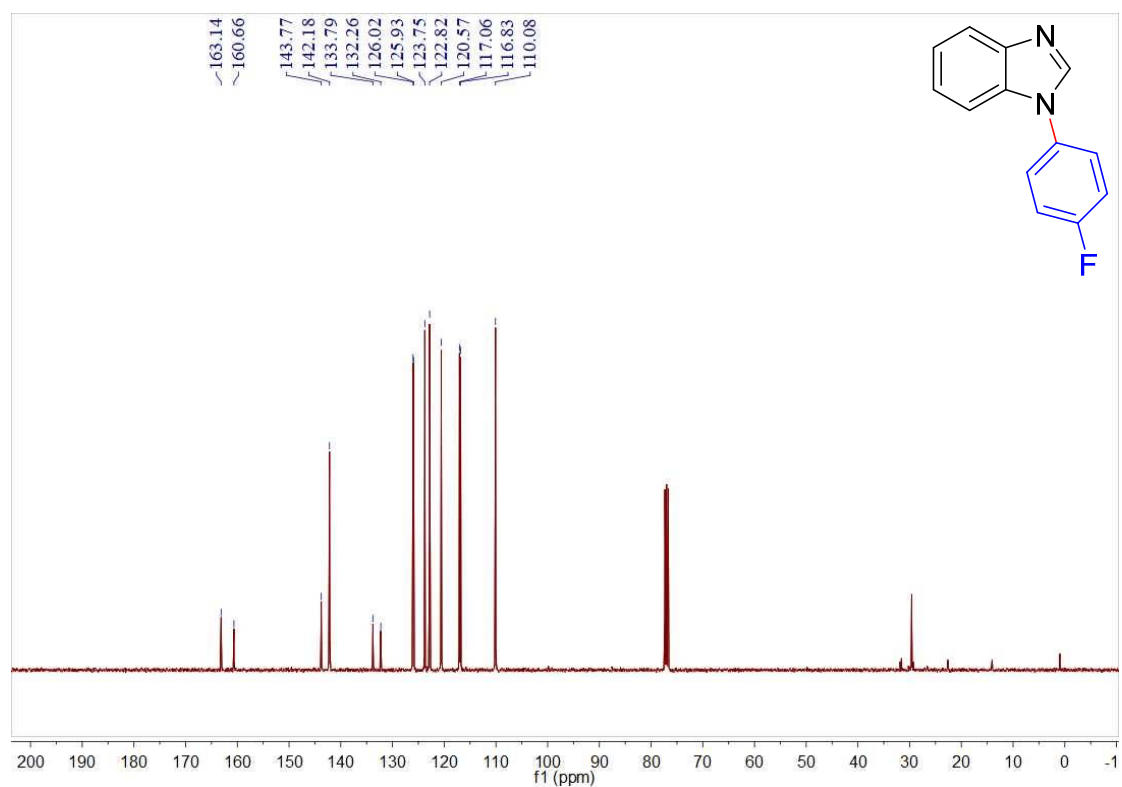

**Figure S17.** <sup>13</sup>C{<sup>1</sup>H} NMR spectra of **8f**

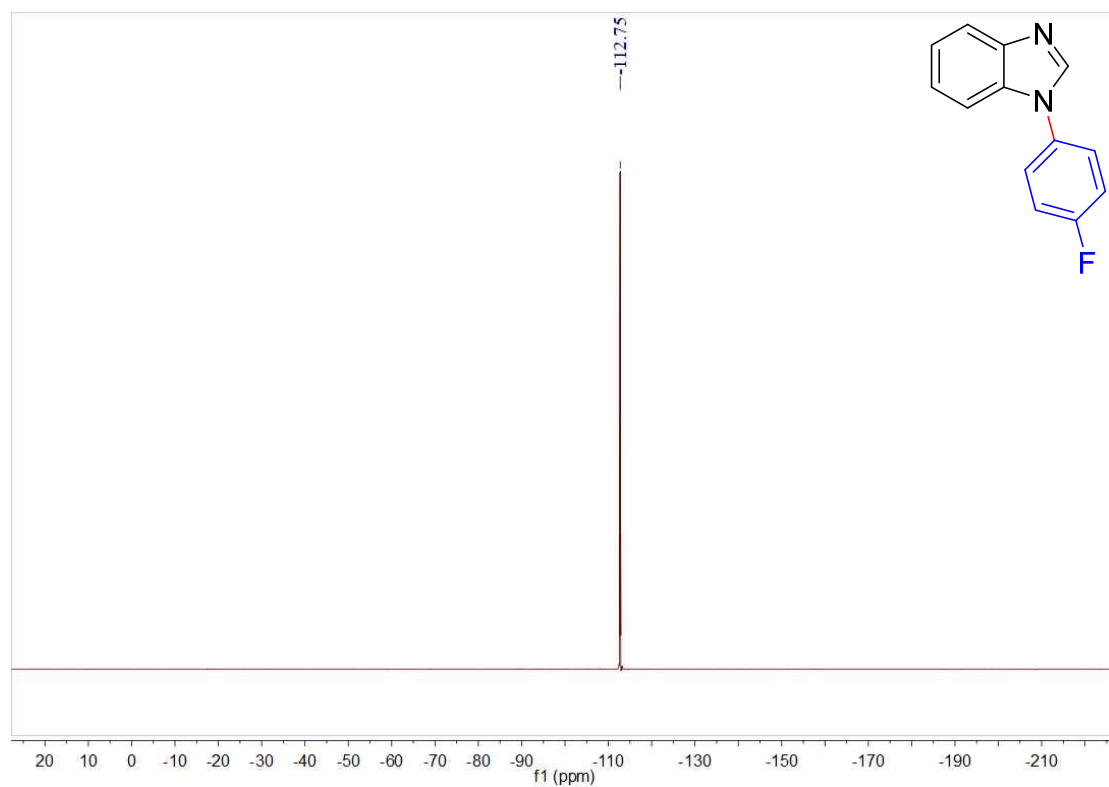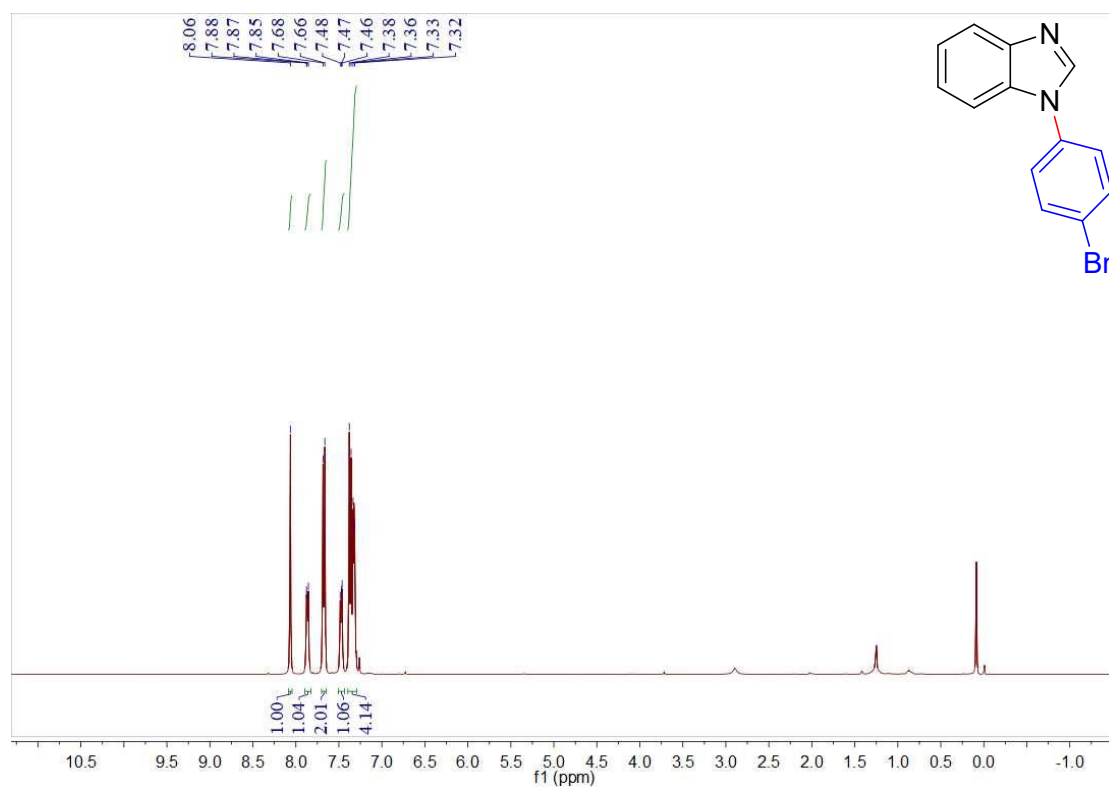

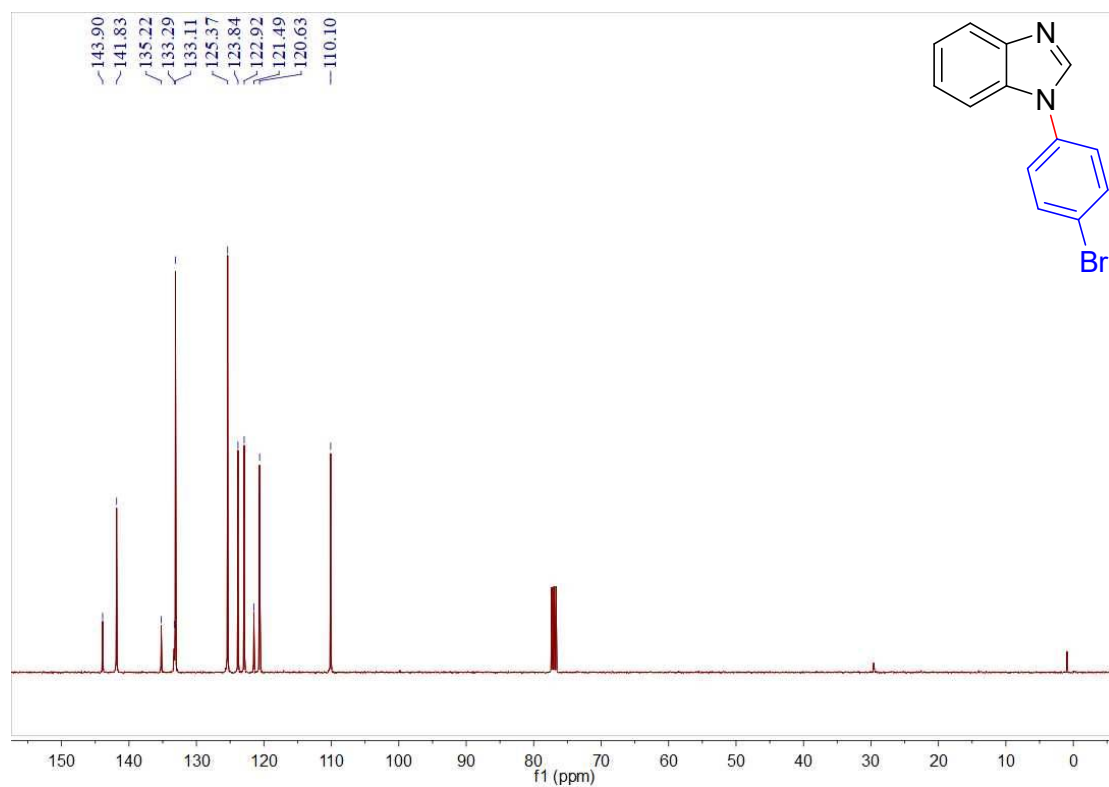

Figure S20.  $^{13}\text{C}\{^1\text{H}\}$  NMR spectra of **8g**

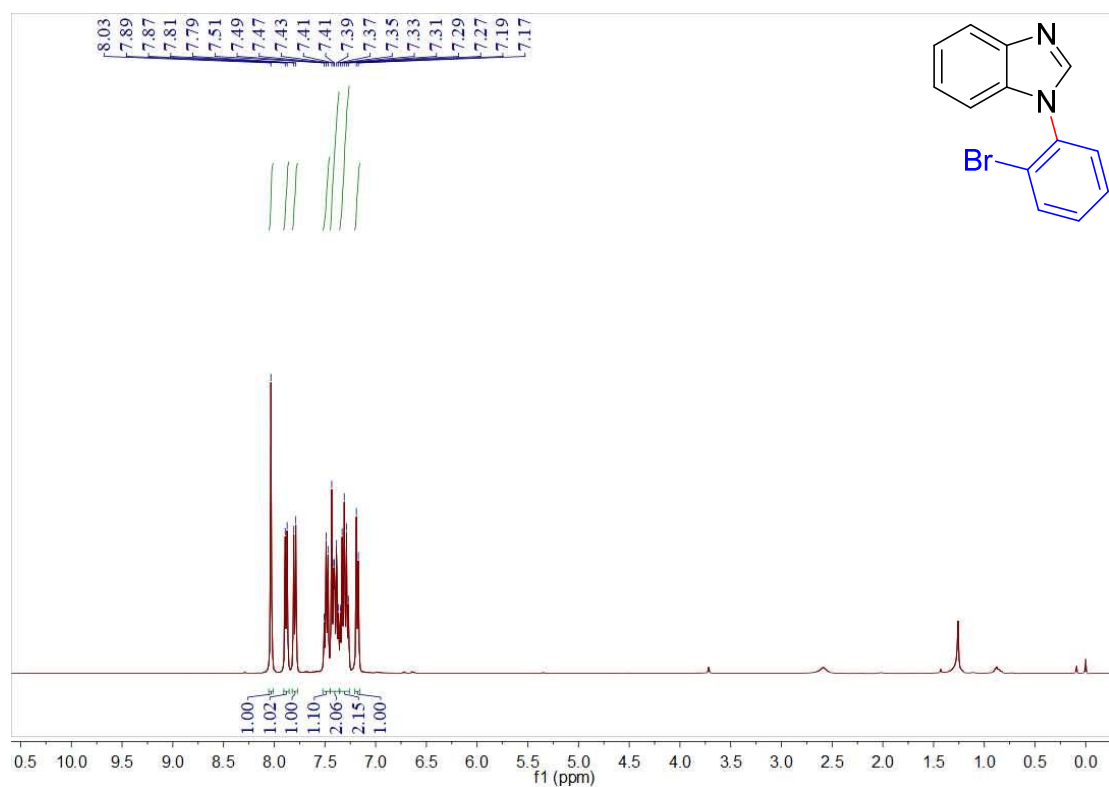

Figure S21.  $^1\text{H}$  NMR spectra of **8h**

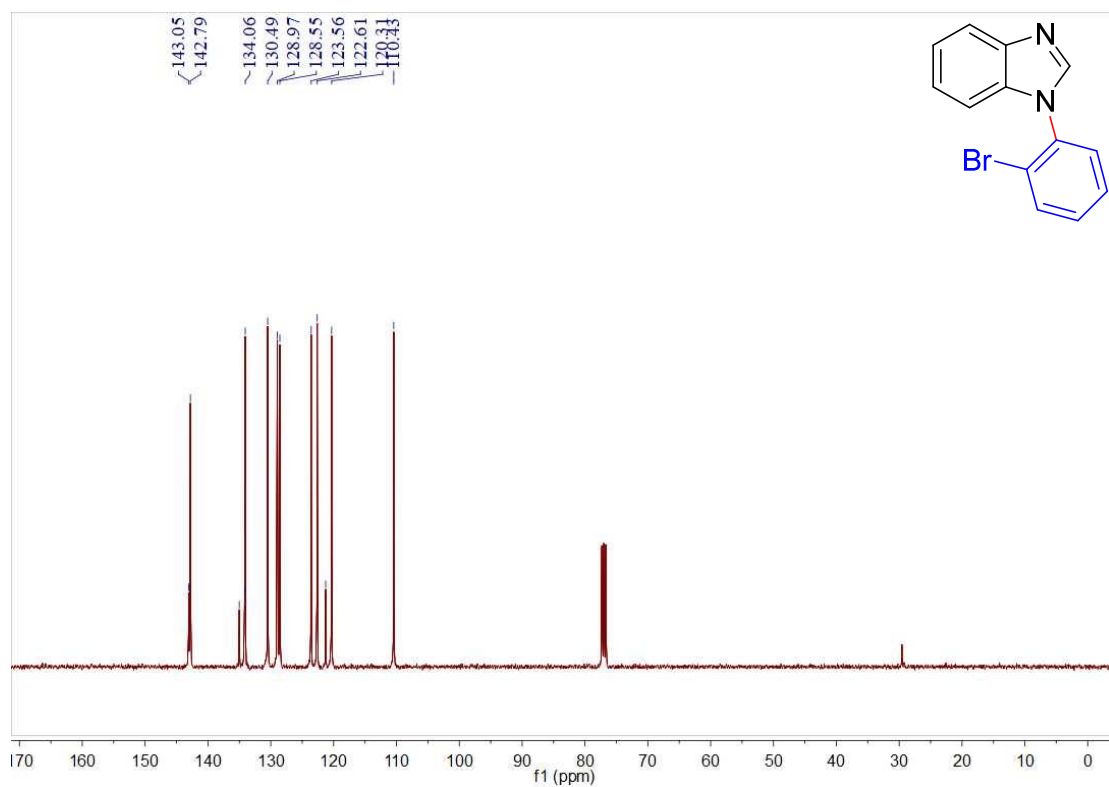

**Figure S22.**  $^{13}\text{C}\{^1\text{H}\}$  NMR spectra of **8h**

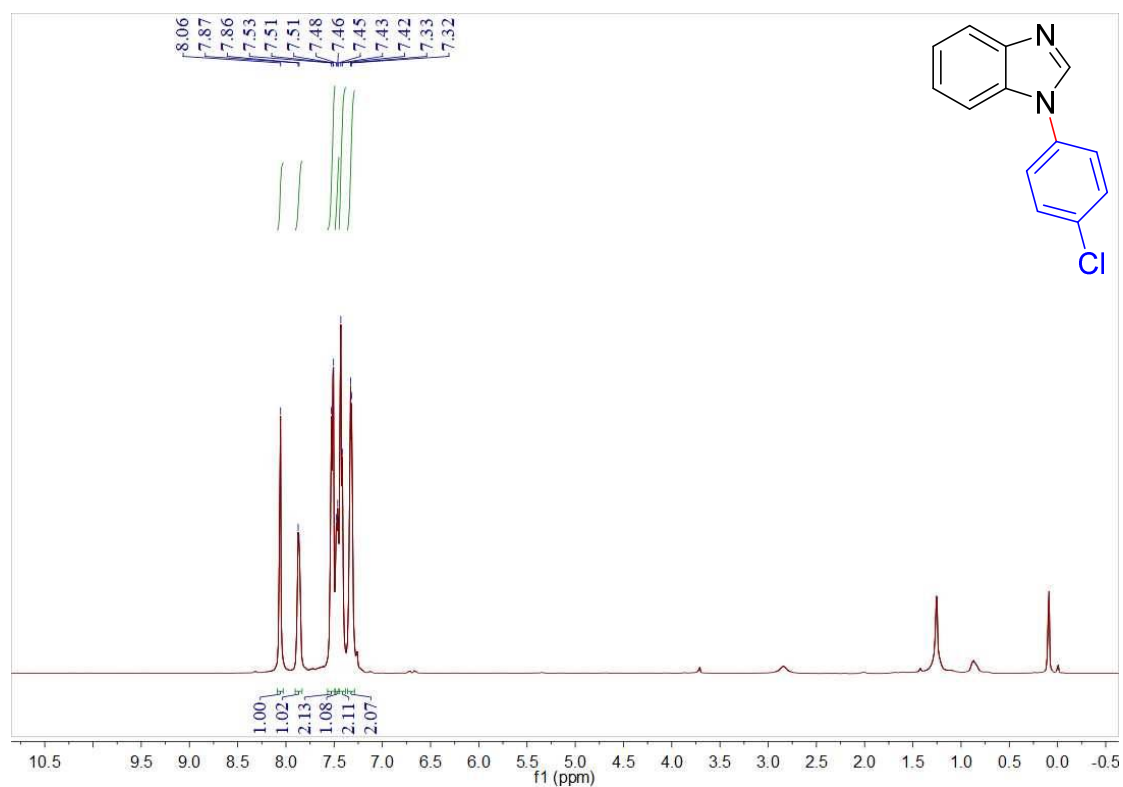

**Figure S23.**  $^1\text{H}$  NMR spectra of **8i**

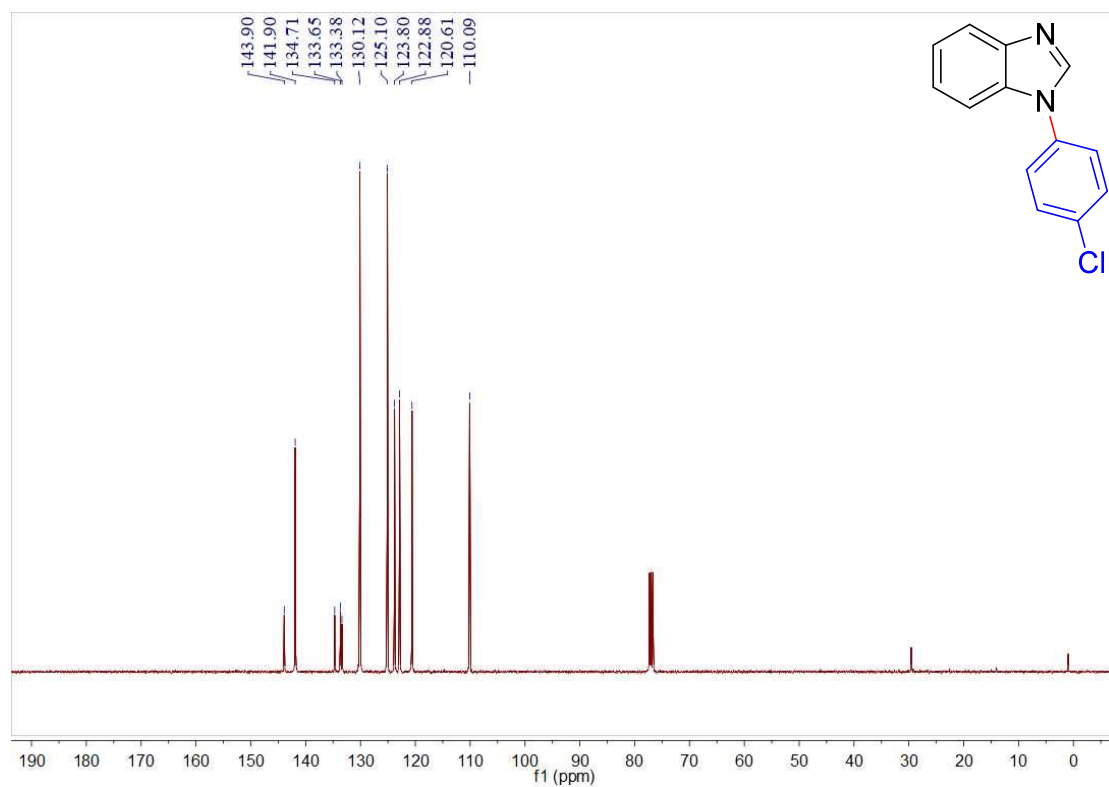

Figure S24.  $^{13}\text{C}\{^1\text{H}\}$  NMR spectra of **8i**

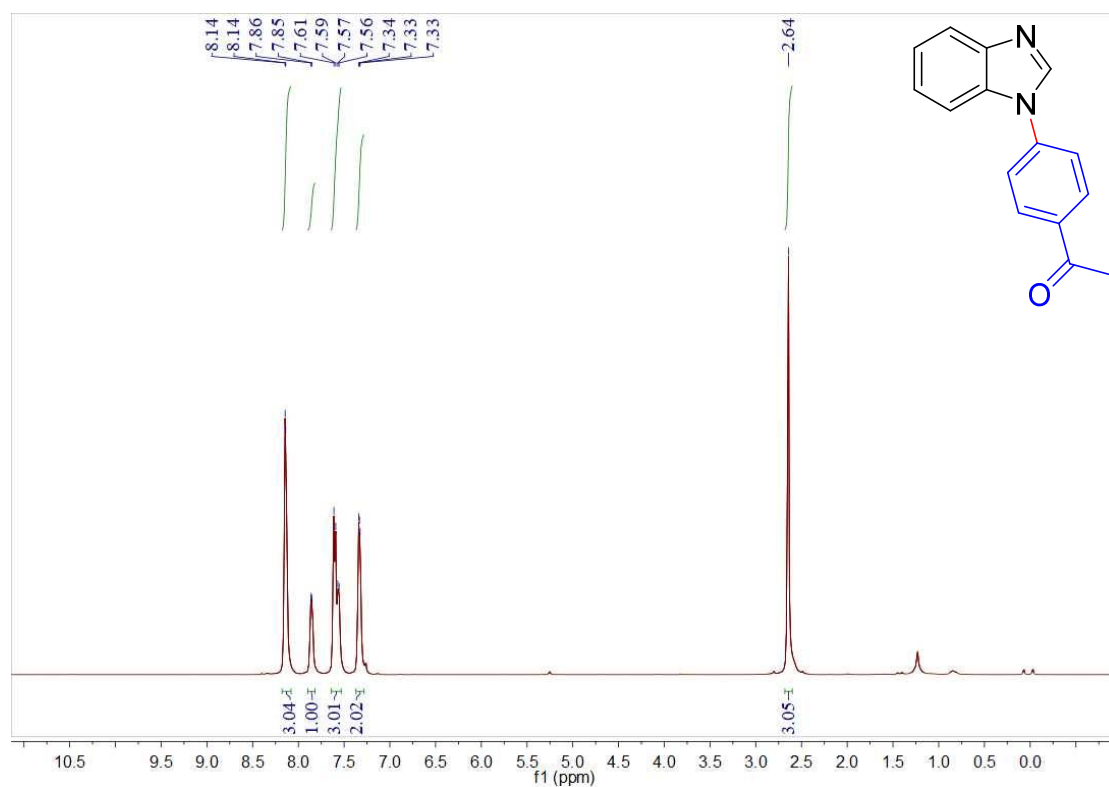

Figure S25.  $^1\text{H}$  NMR spectra of **8j**

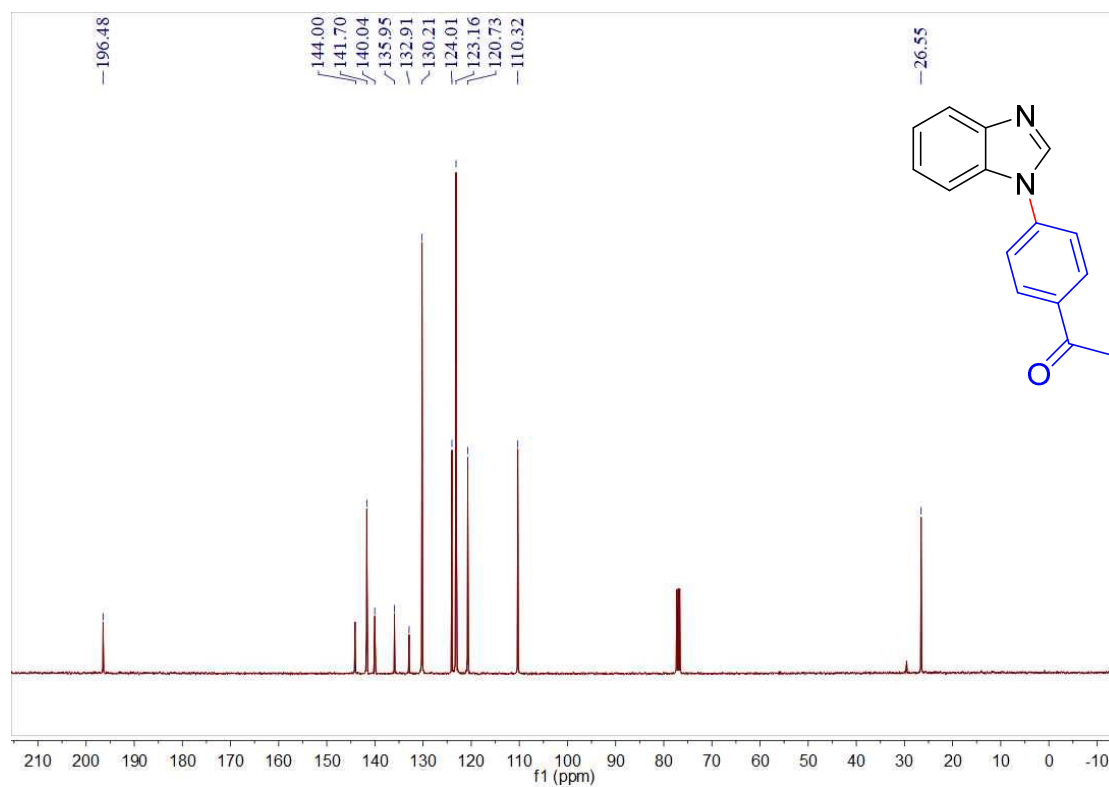

**Figure S26.**  $^{13}\text{C}\{^1\text{H}\}$  NMR spectra of **8j**

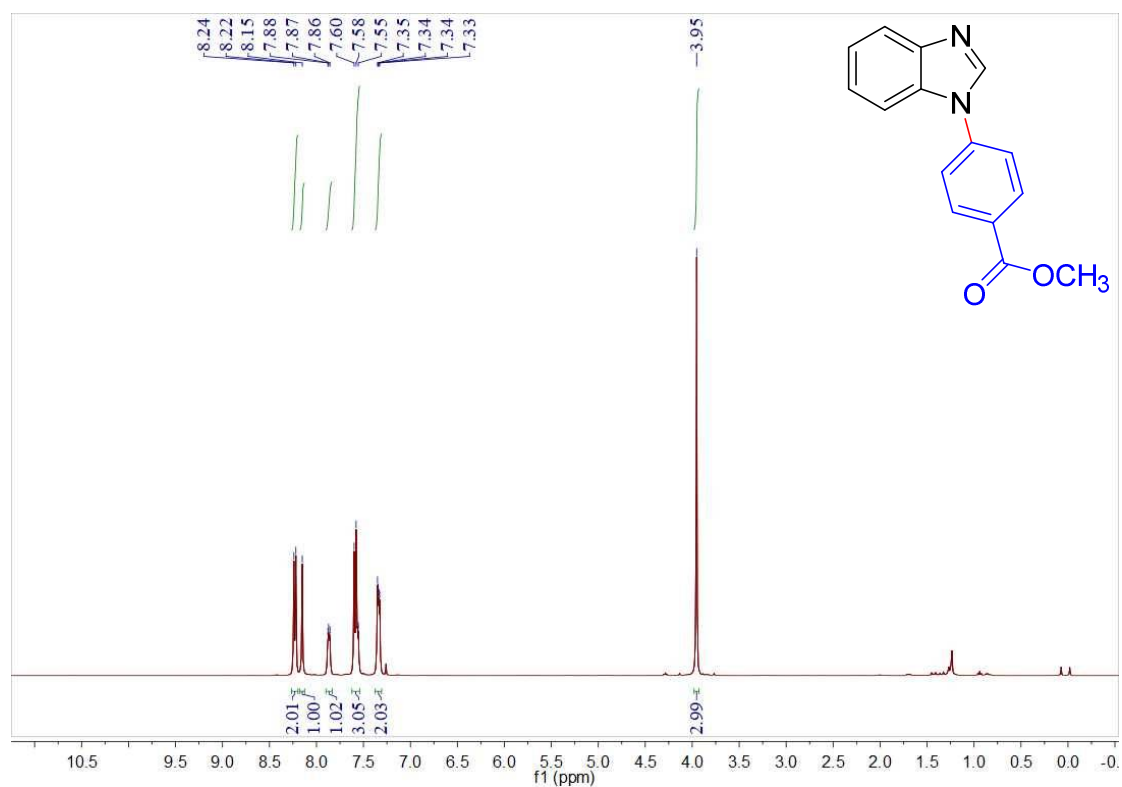

**Figure S27.**  $^1\text{H}$  NMR spectra of **8k**



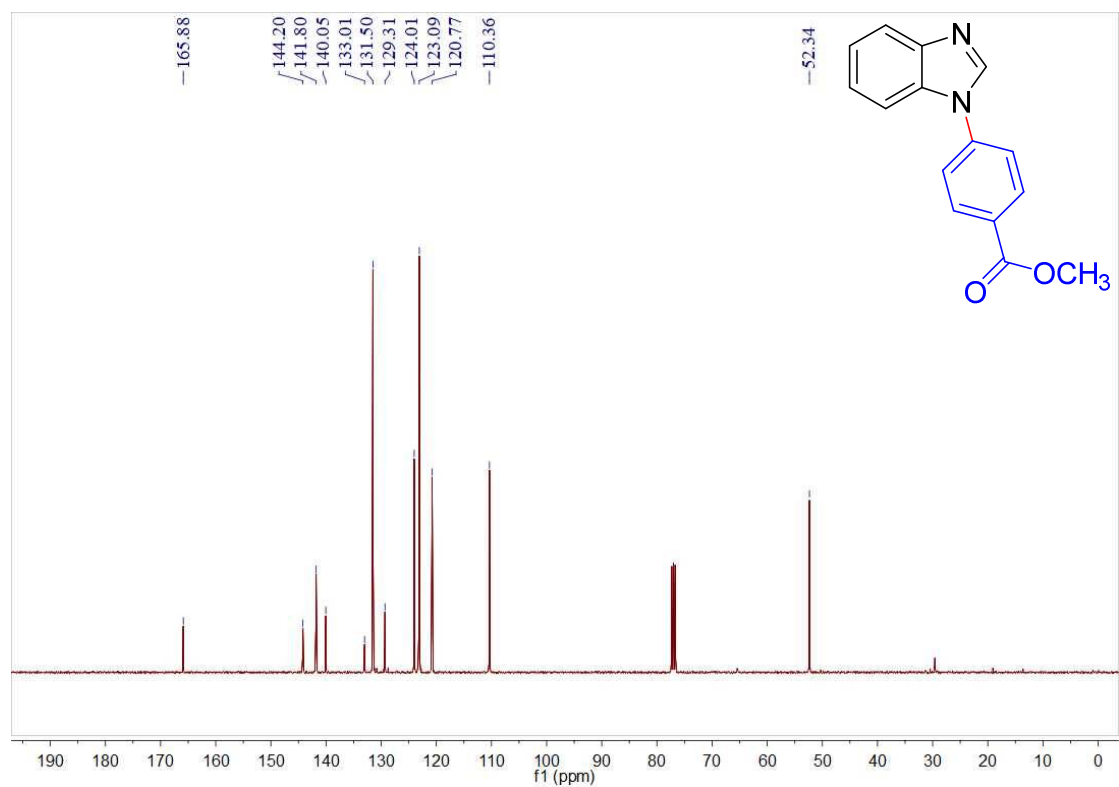

**Figure S28.**  $^{13}\text{C}\{^1\text{H}\}$  NMR spectra of **8k**

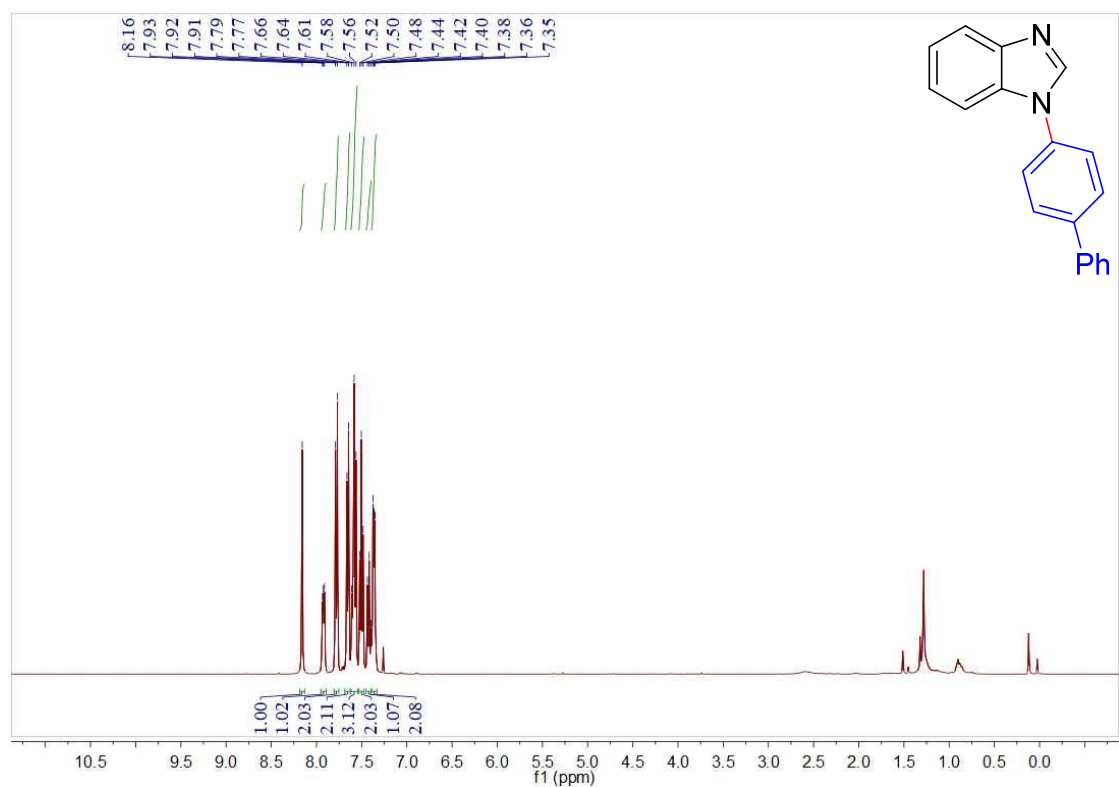

**Figure S29.**  $^1\text{H}$  NMR spectra of **8l**

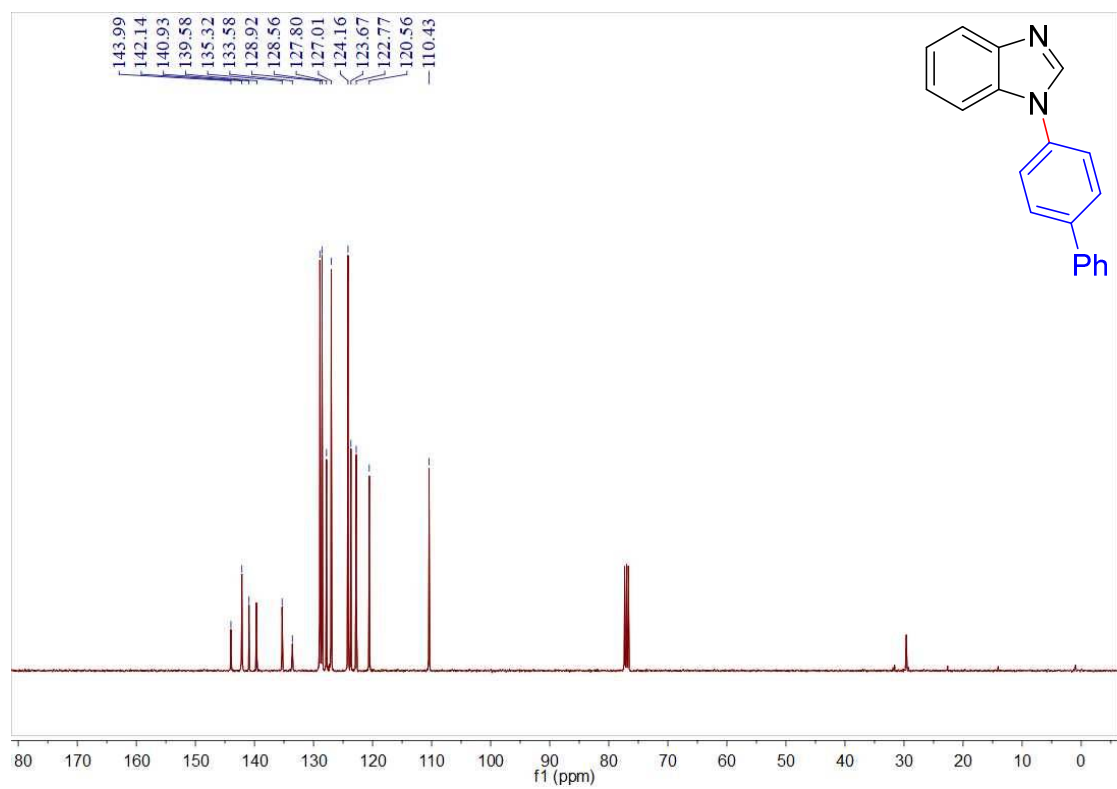

**Figure S30.**  $^{13}\text{C}\{^1\text{H}\}$  NMR spectra of **8l**

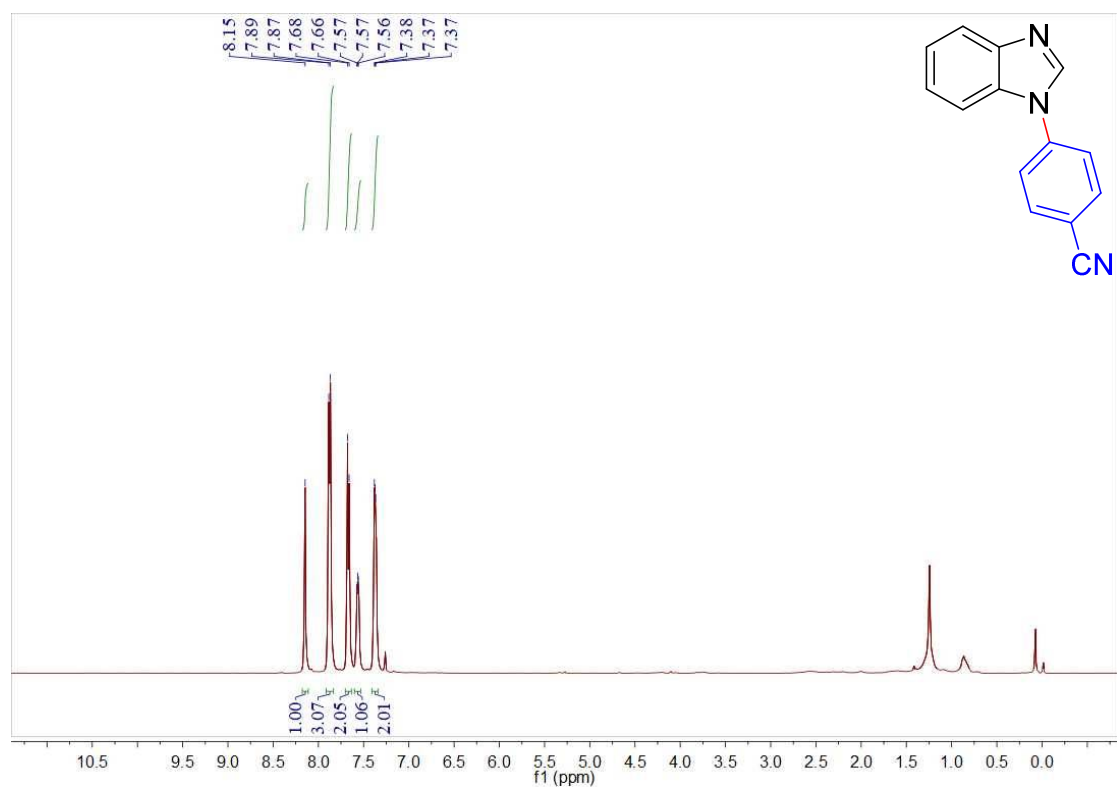

**Figure S31.**  $^1\text{H}$  NMR spectra of **8m**

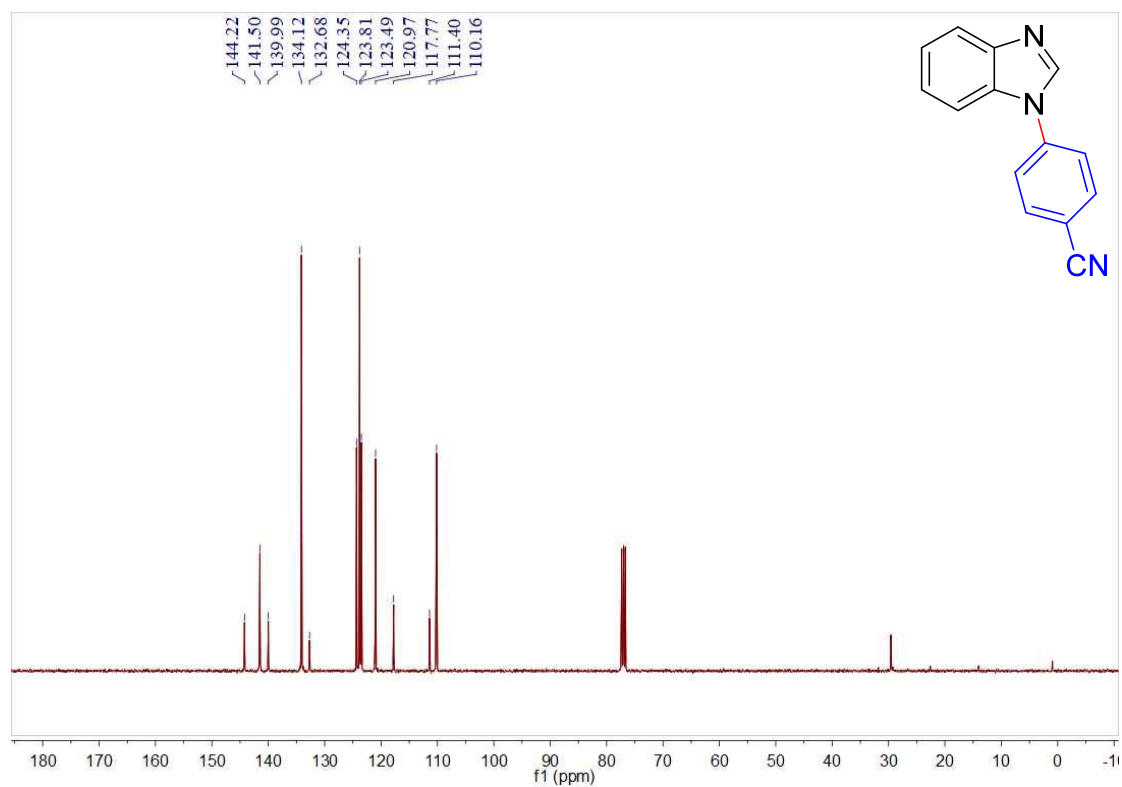

**Figure S32.**  $^{13}\text{C}\{^1\text{H}\}$  NMR spectra of **8m**

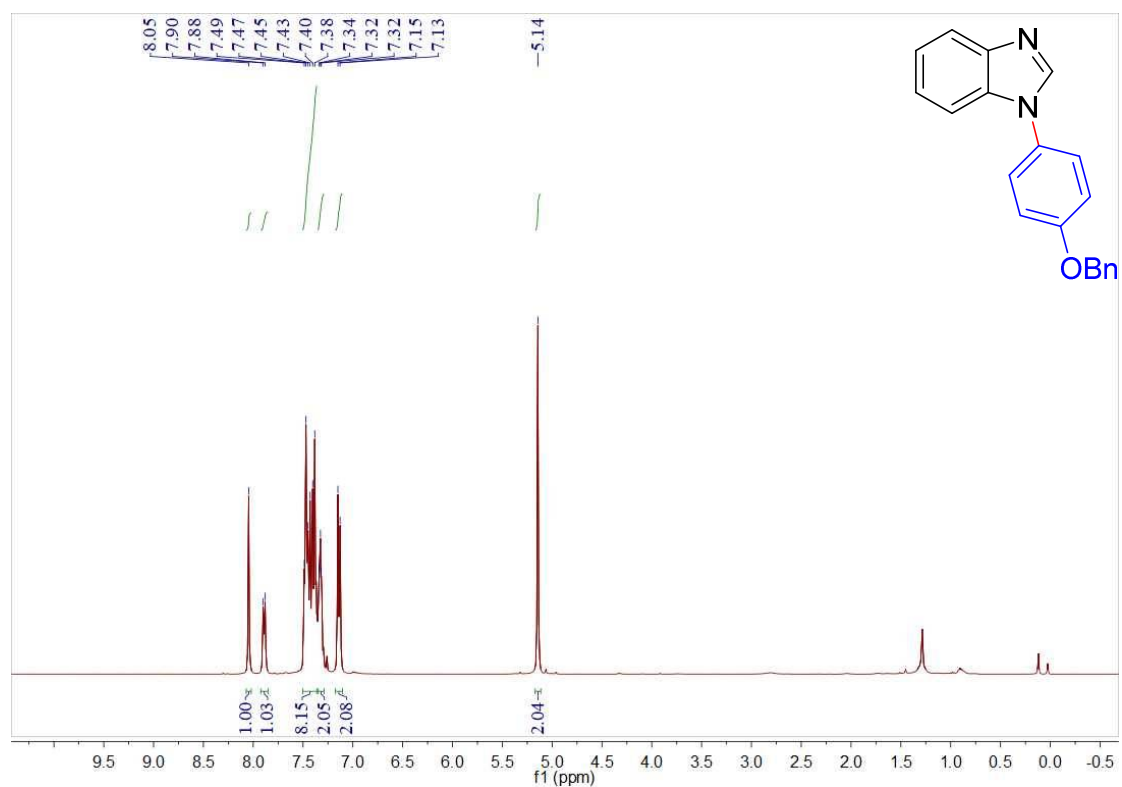

**Figure S33.**  $^1\text{H}$  NMR spectra of **8n**

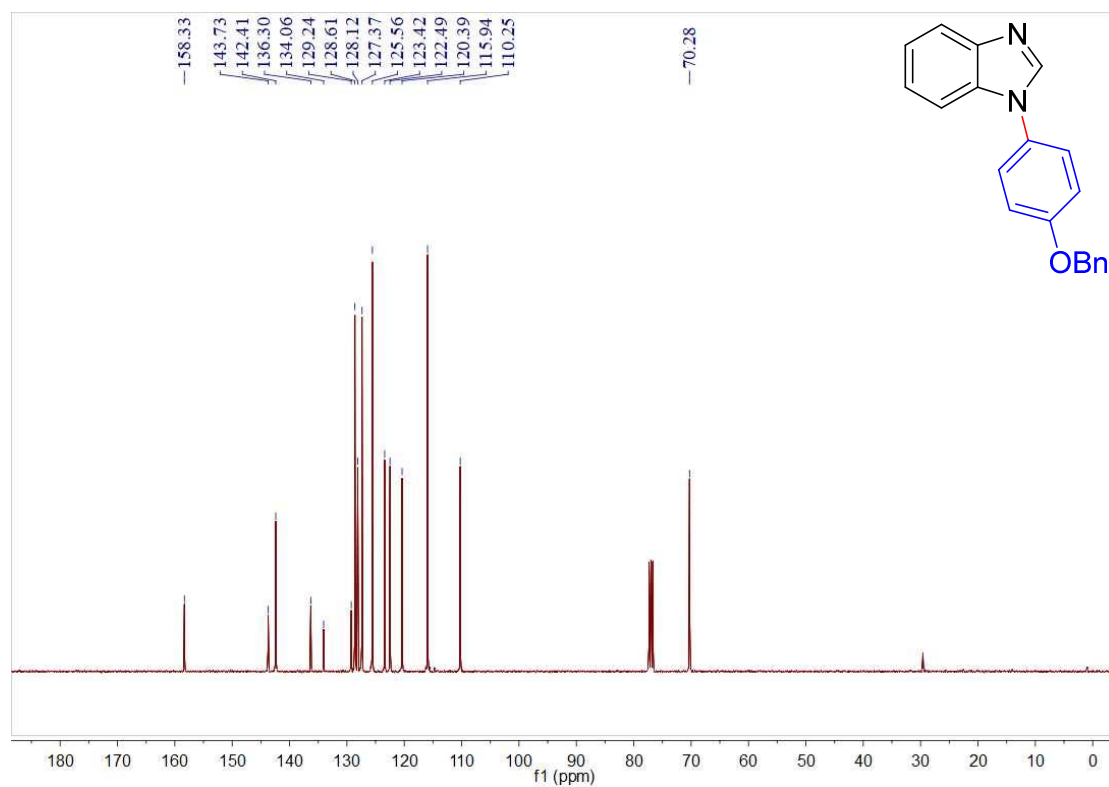

**Figure S34.** <sup>13</sup>C{<sup>1</sup>H} NMR spectra of **8n**

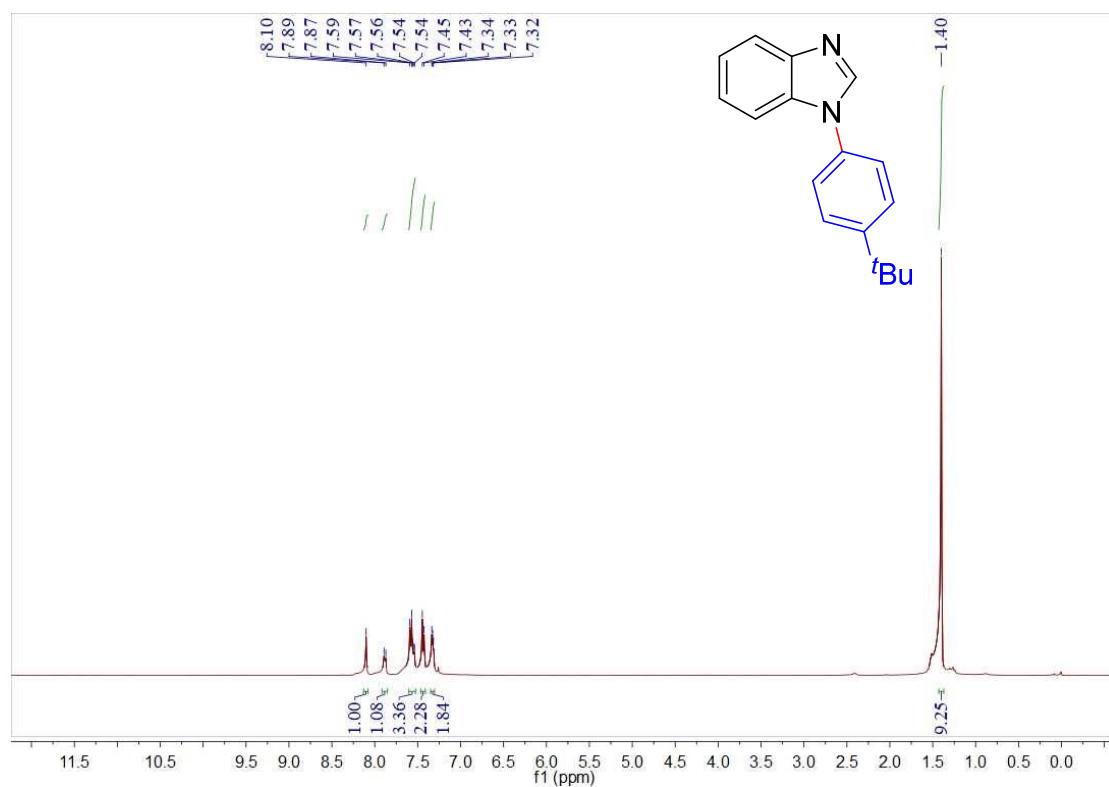

**Figure S35.** <sup>1</sup>H NMR spectra of **8o**

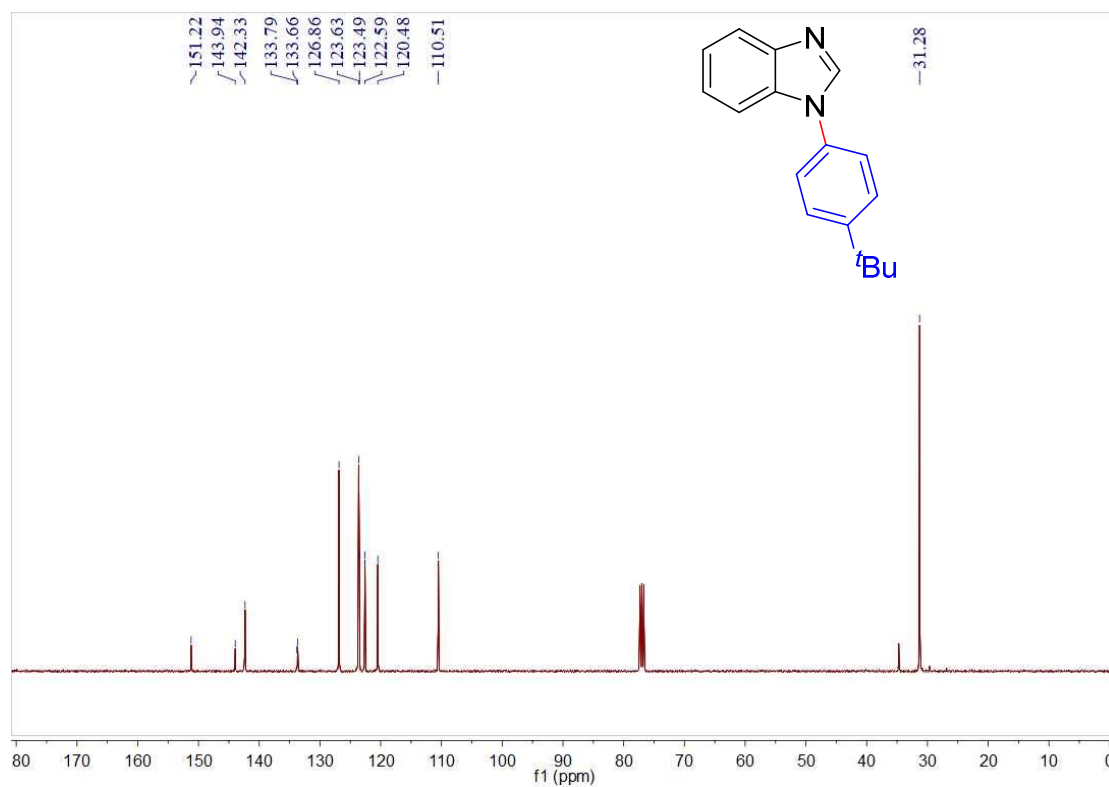

**Figure S36.**  $^{13}\text{C}\{^1\text{H}\}$  NMR spectra of **8o**

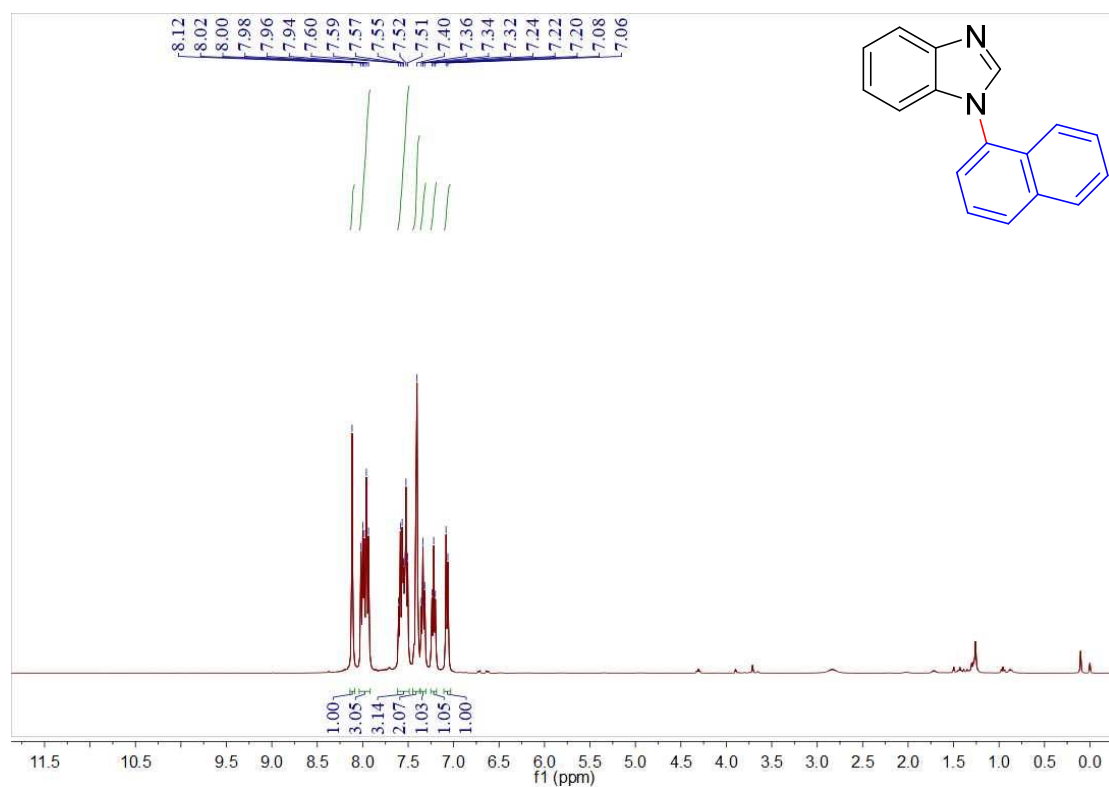

**Figure S37.**  $^1\text{H}$  NMR spectra of **8p**

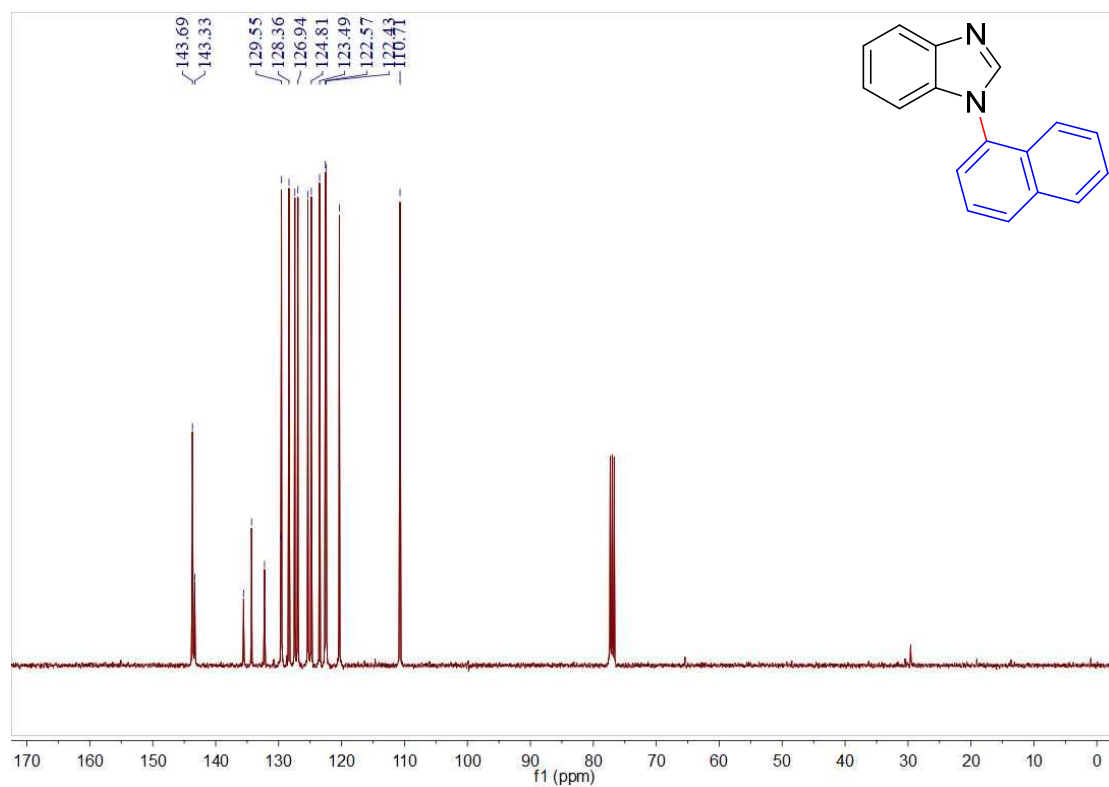

**Figure S38.**  $^{13}\text{C}\{^1\text{H}\}$  NMR spectra of **8p**

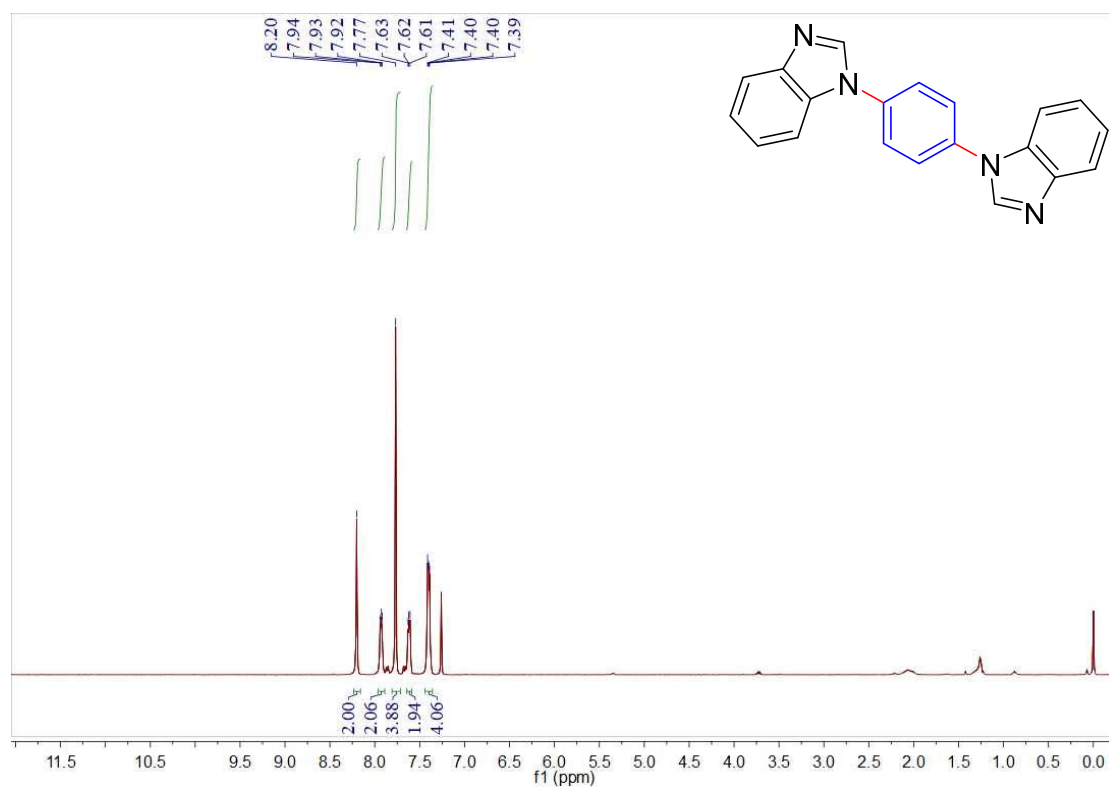

**Figure S39.**  $^1\text{H}$  NMR spectra of **8s**

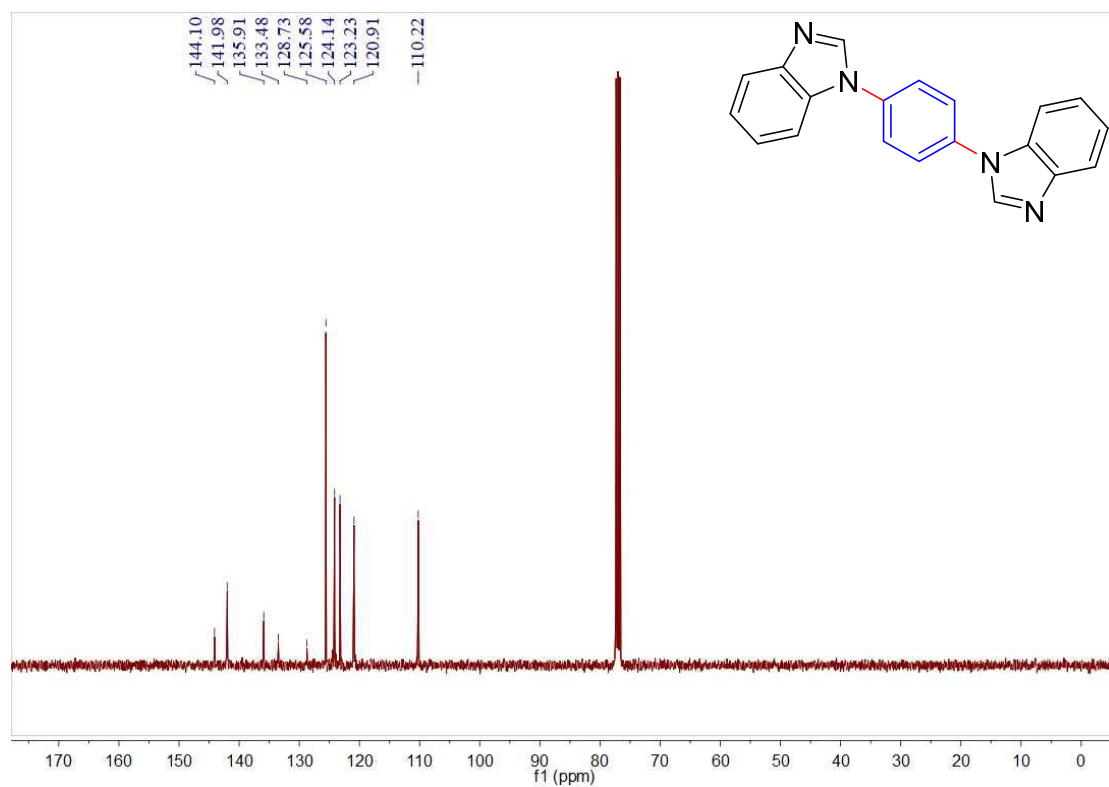

Figure S40.  $^{13}\text{C}\{^1\text{H}\}$  NMR spectra of **8s**

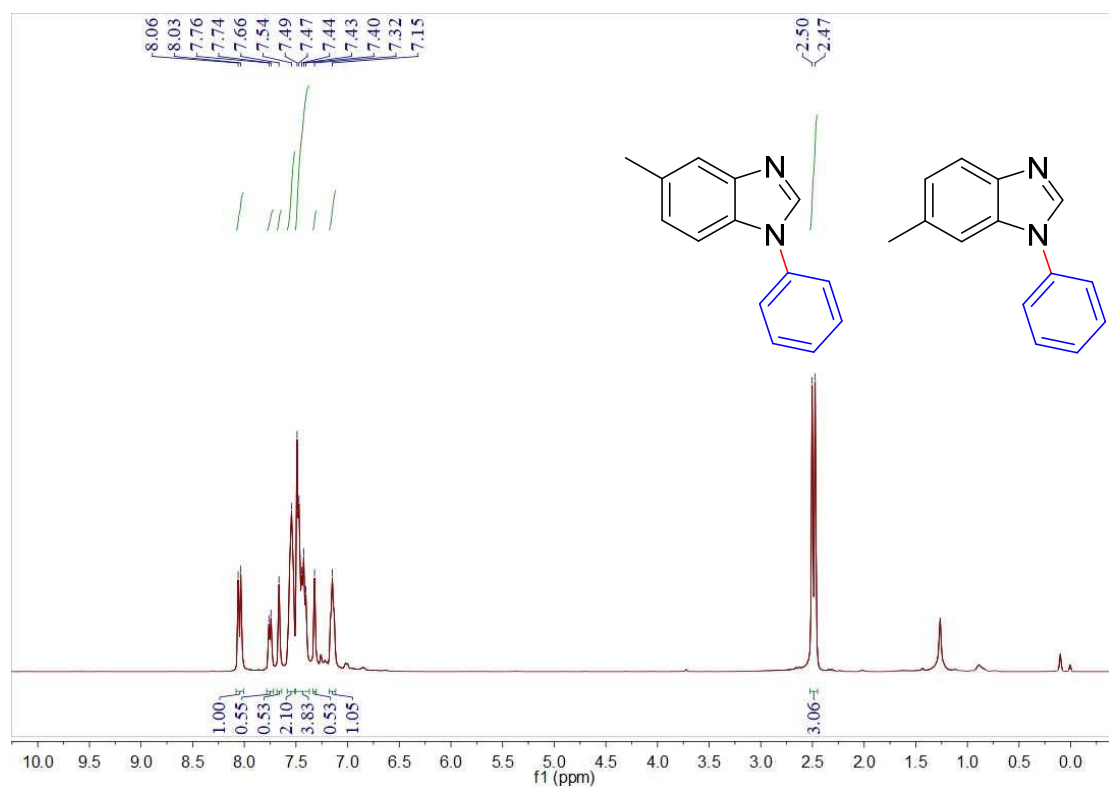

Figure S41.  $^1\text{H}$  NMR spectra of **8t/8t'**

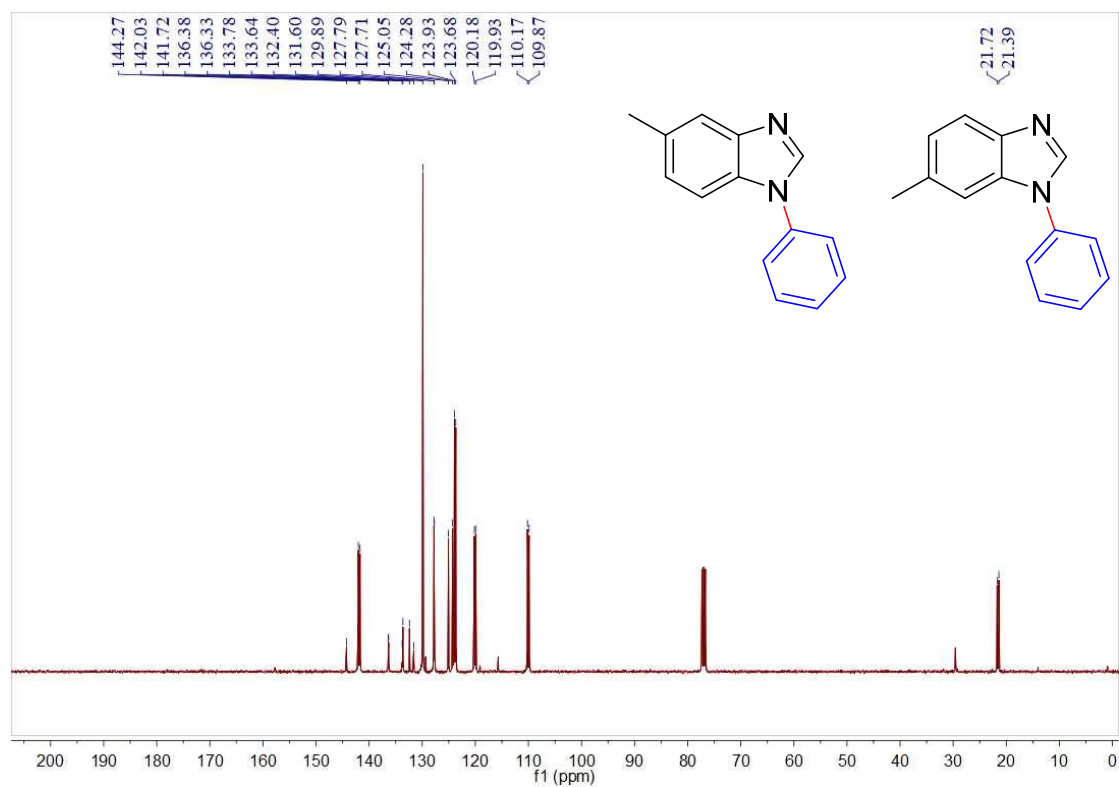

**Figure S42.** <sup>13</sup>C{<sup>1</sup>H} NMR spectra of **8t/8t'**

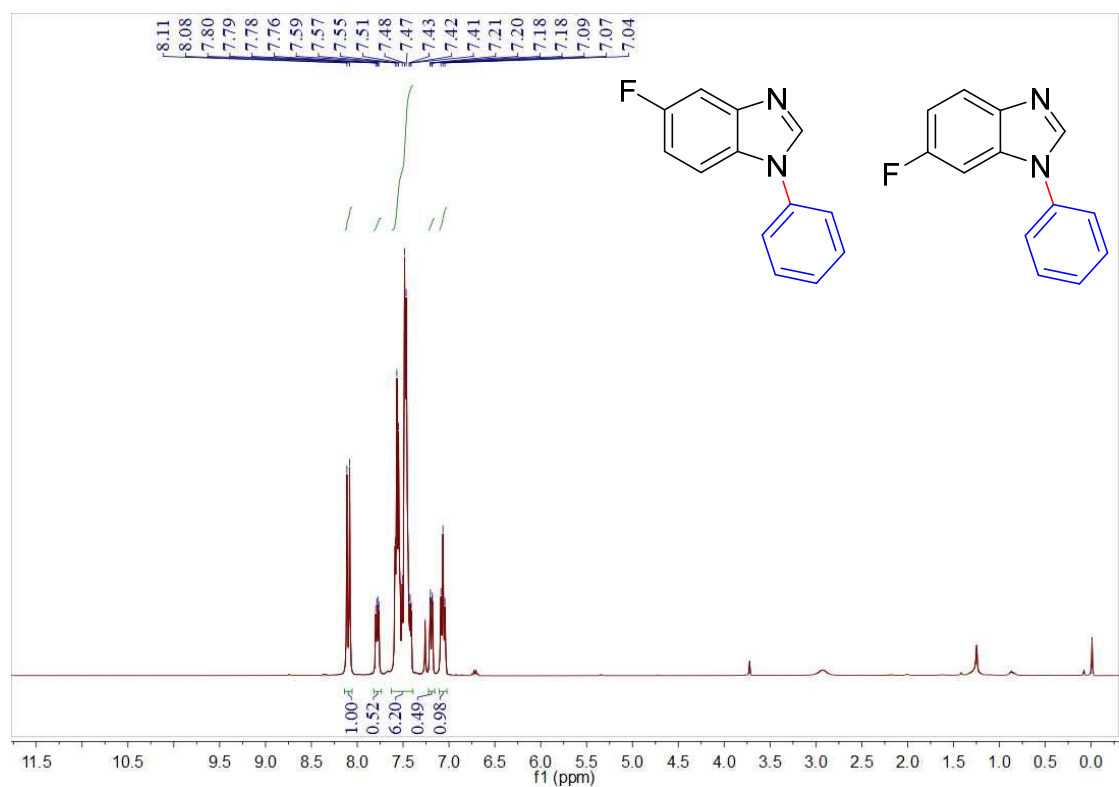

**Figure S43.** <sup>1</sup>H NMR spectra of **8u/8u'**



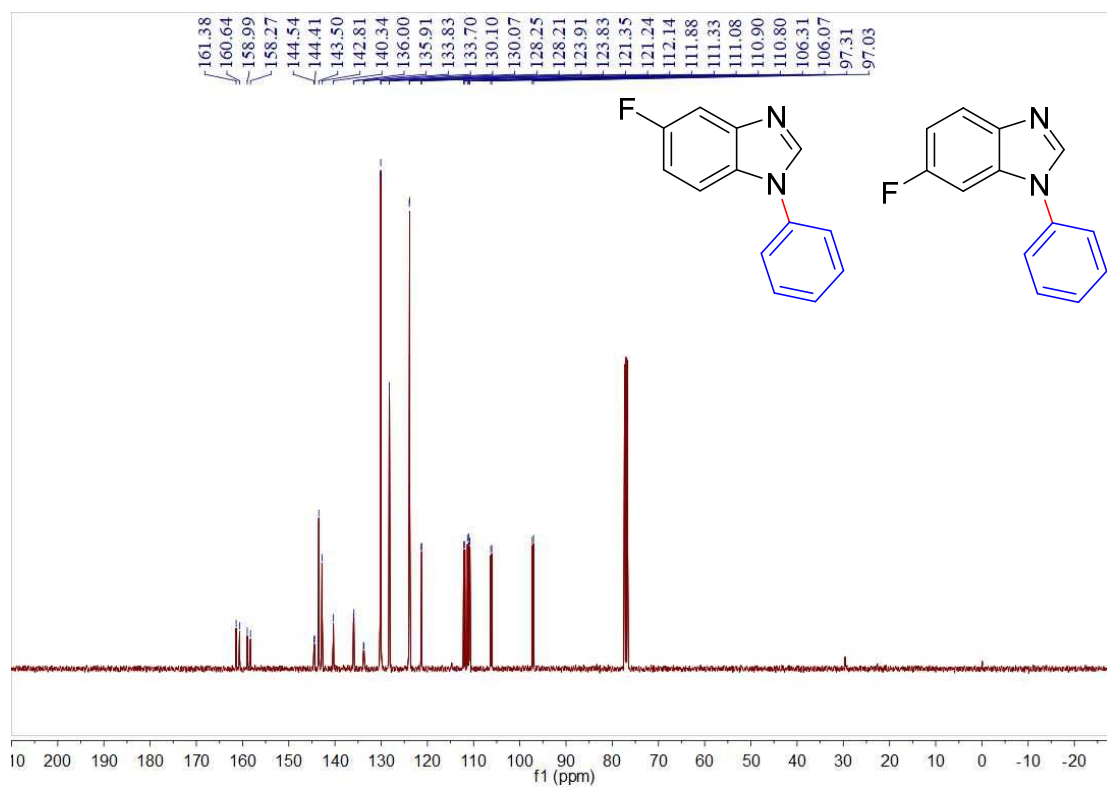

Figure S44.  $^{13}\text{C}\{^1\text{H}\}$  NMR spectra of 8u/8u'

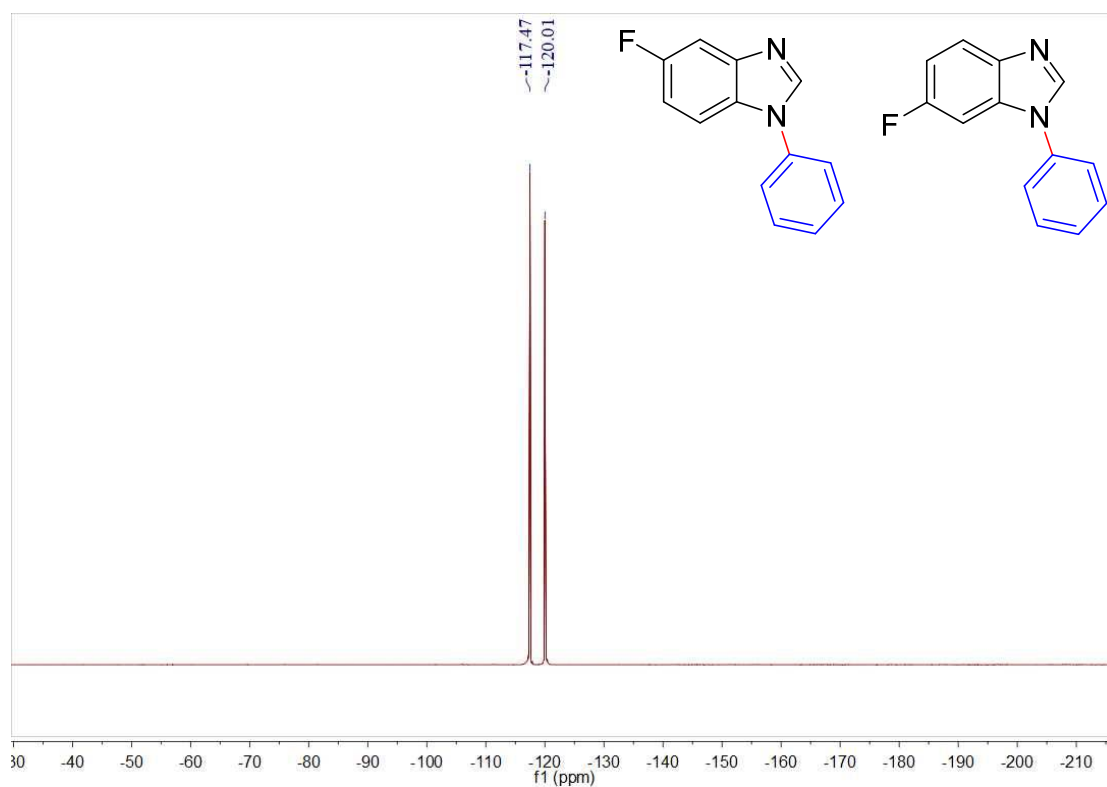

Figure S45.  $^{19}\text{F}$  NMR spectra of 8u/8u'

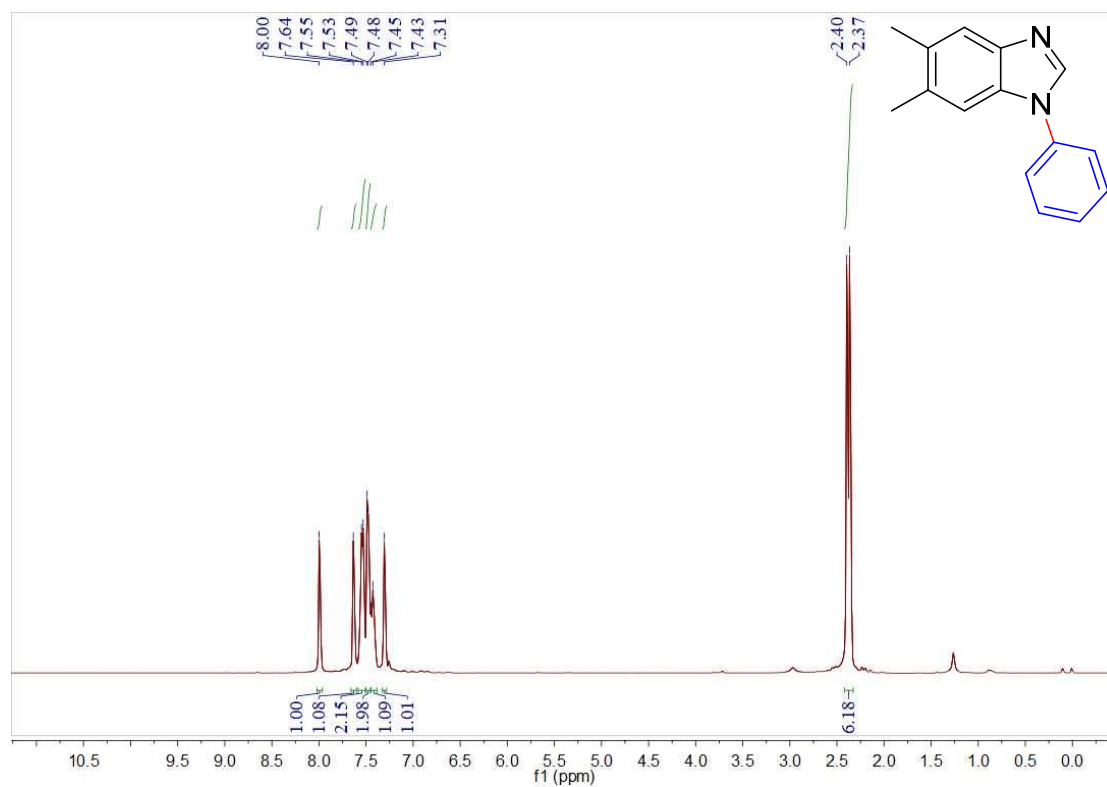

Figure S46. <sup>1</sup>H NMR spectra of **8v**

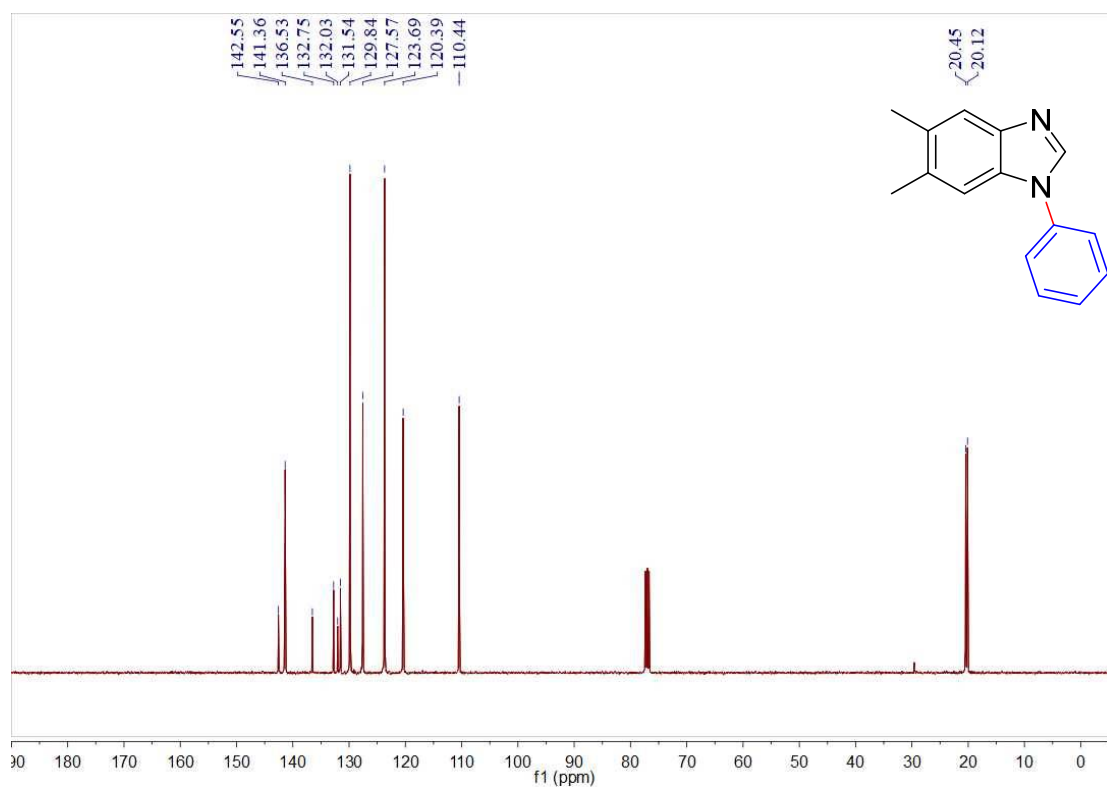

Figure S47. <sup>13</sup>C{<sup>1</sup>H} NMR spectra of **8v**

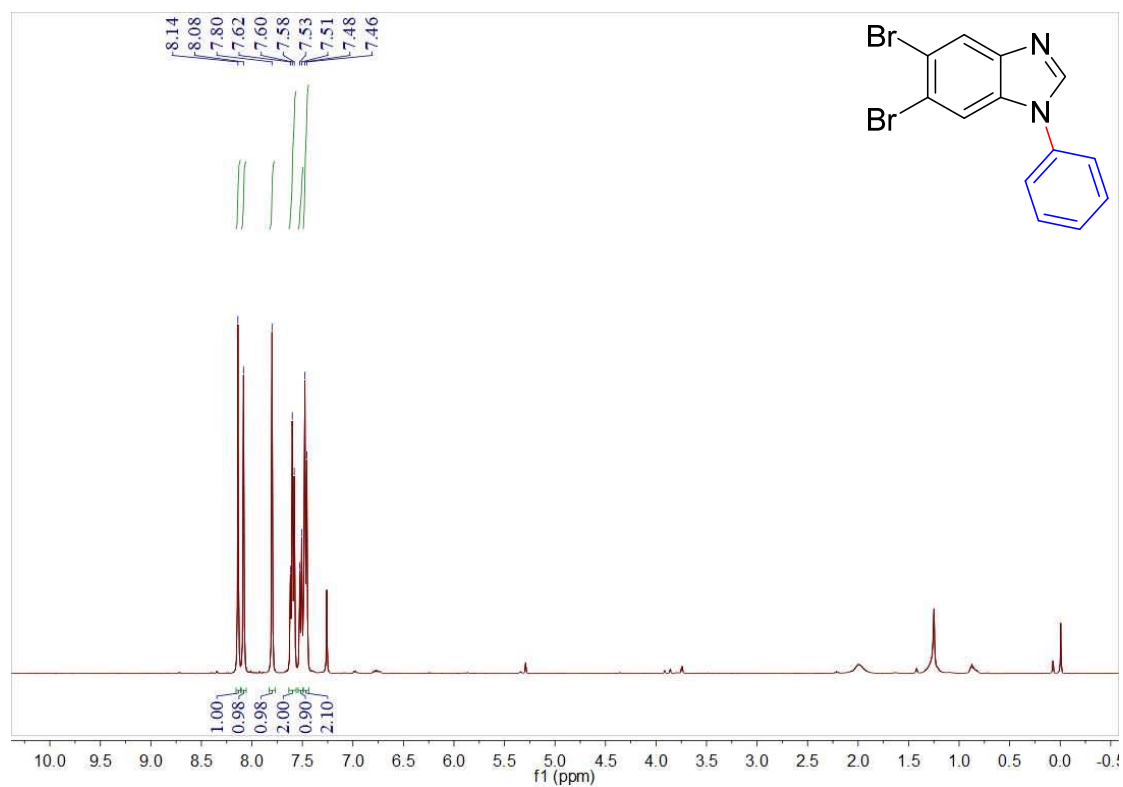

**Figure S48.** <sup>1</sup>H NMR spectra of **8w**

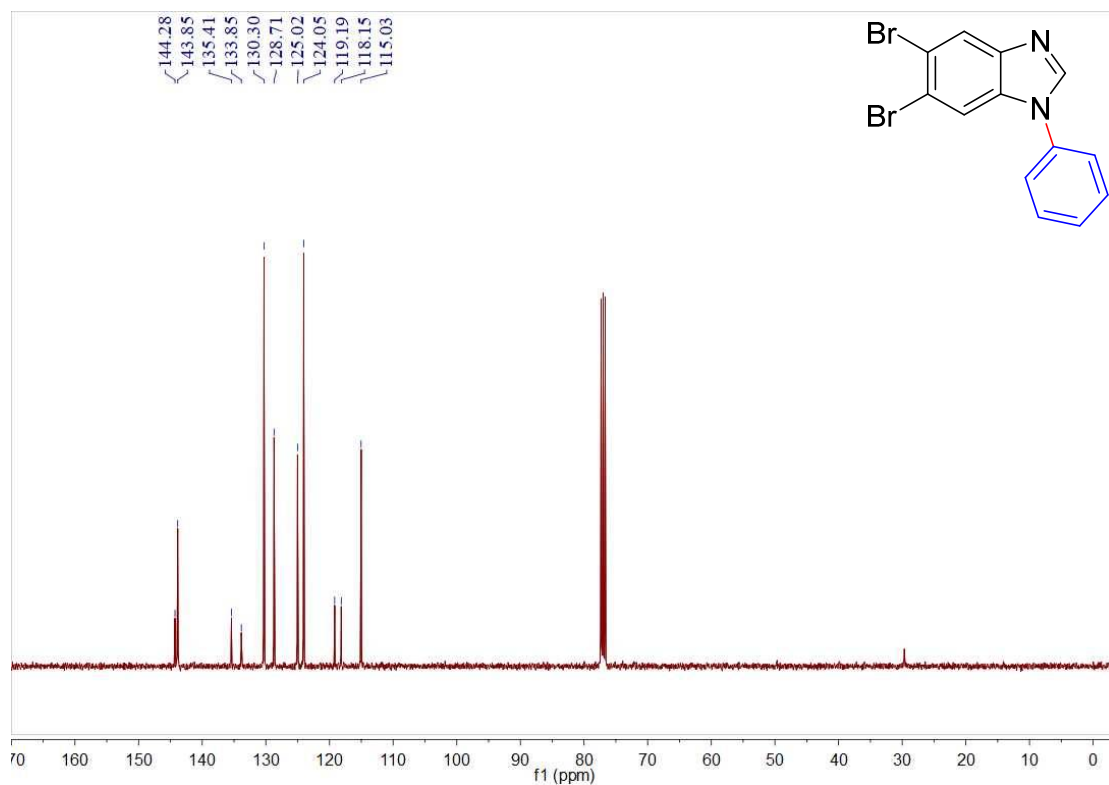

**Figure S49.** <sup>13</sup>C{<sup>1</sup>H} NMR spectra of **8w**

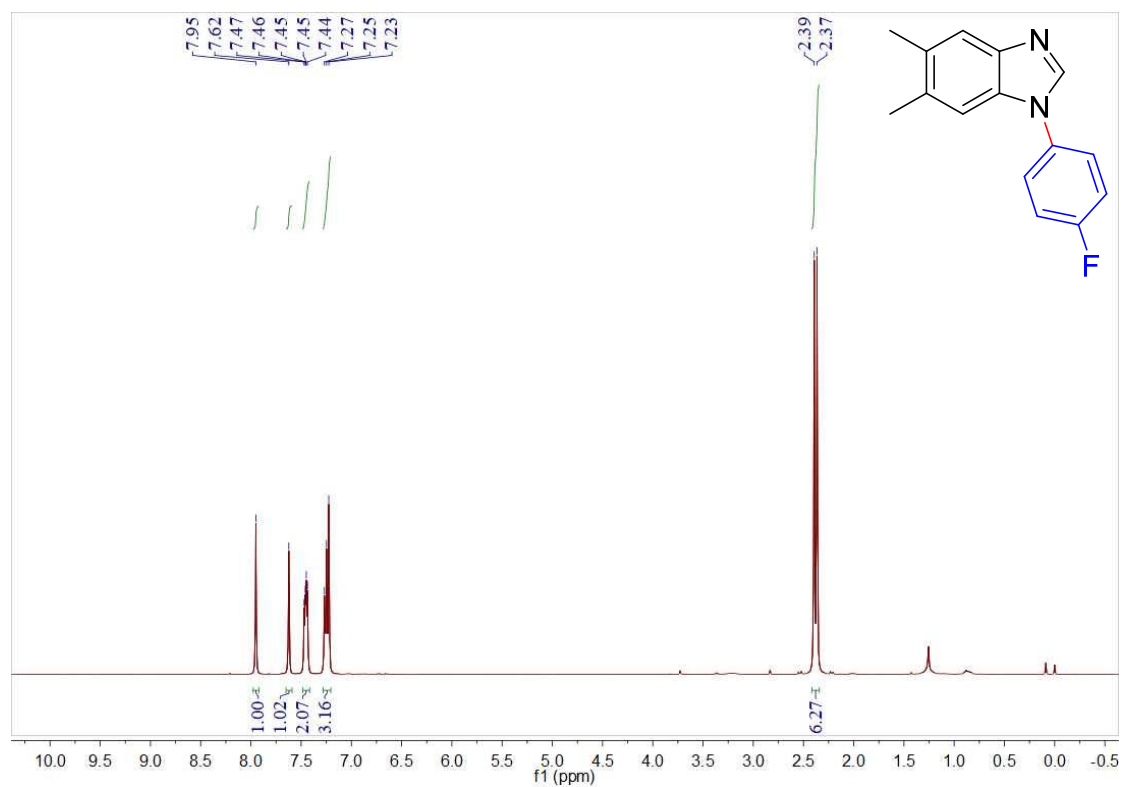

**Figure S50.** <sup>1</sup>H NMR spectra of **8x**

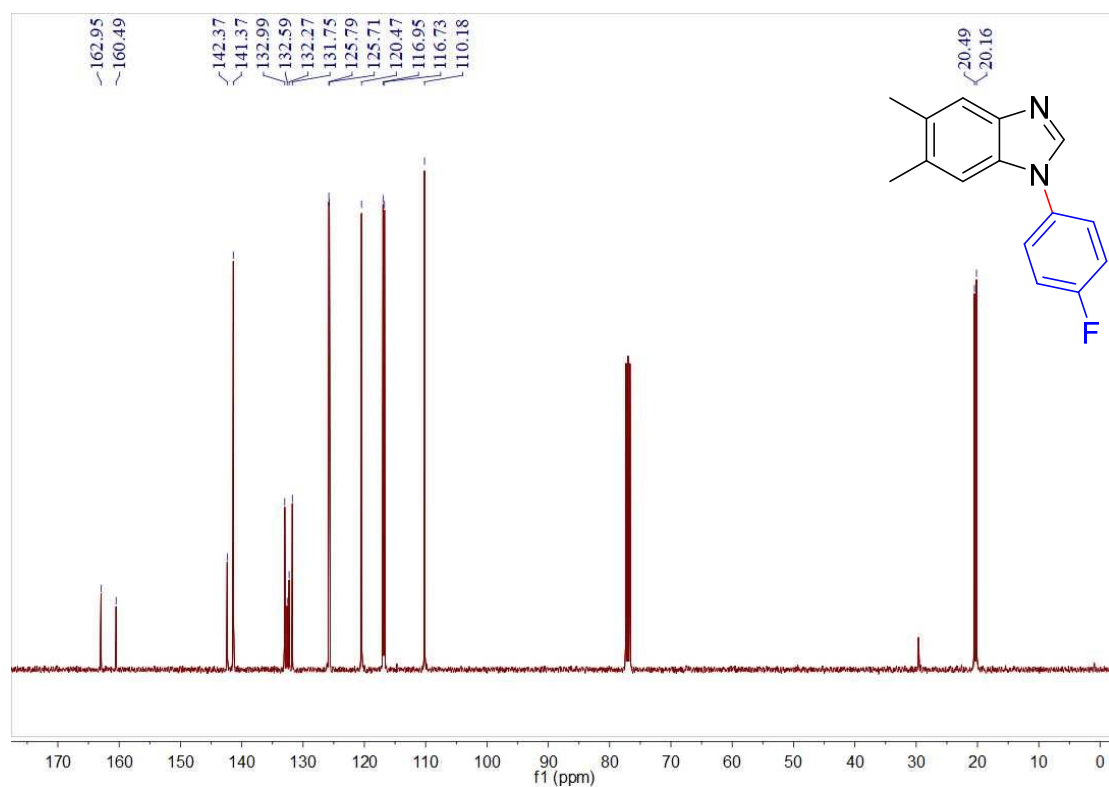

**Figure S51.** <sup>13</sup>C{<sup>1</sup>H} NMR spectra of **8x**

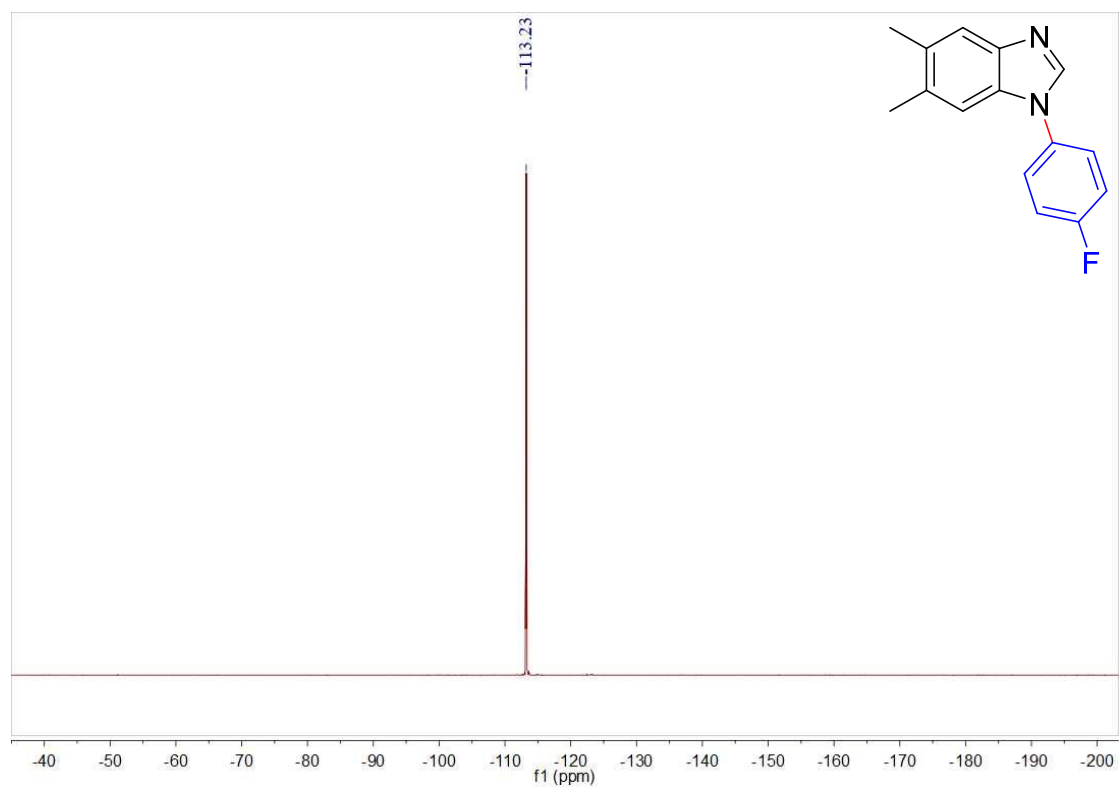

**Figure S52.** <sup>19</sup>F NMR spectra of **8x**

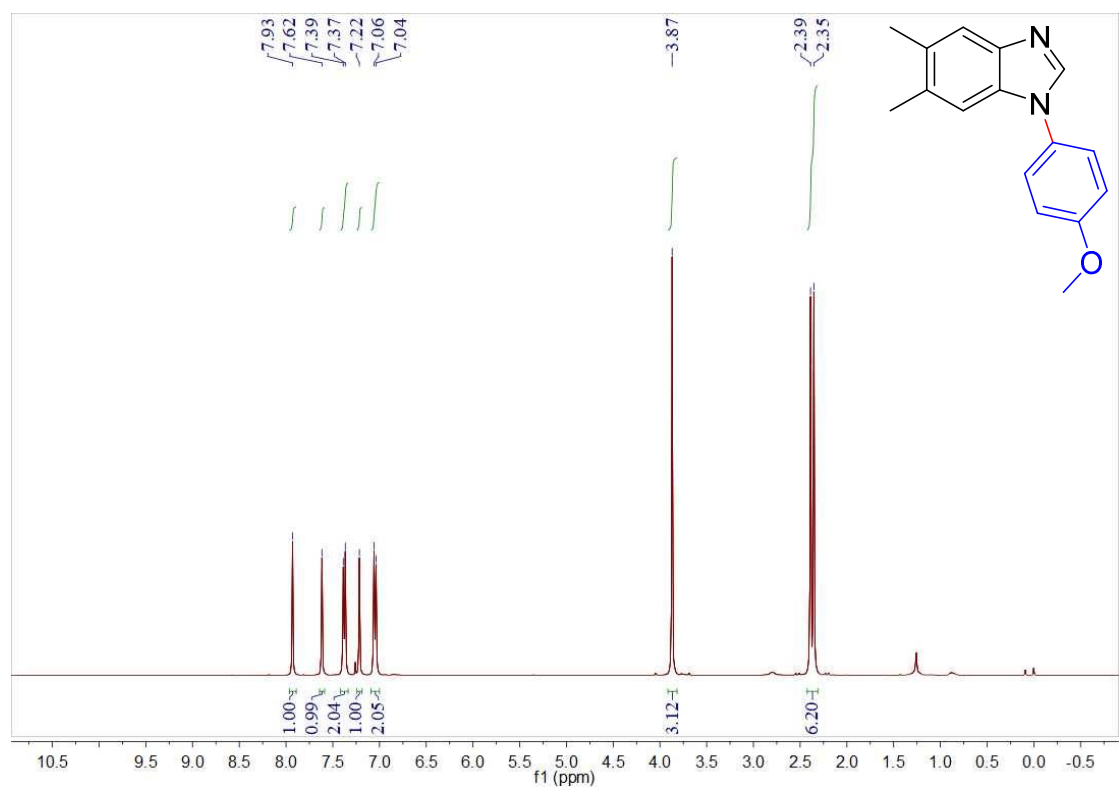

**Figure S53.** <sup>1</sup>H NMR spectra of **8y**

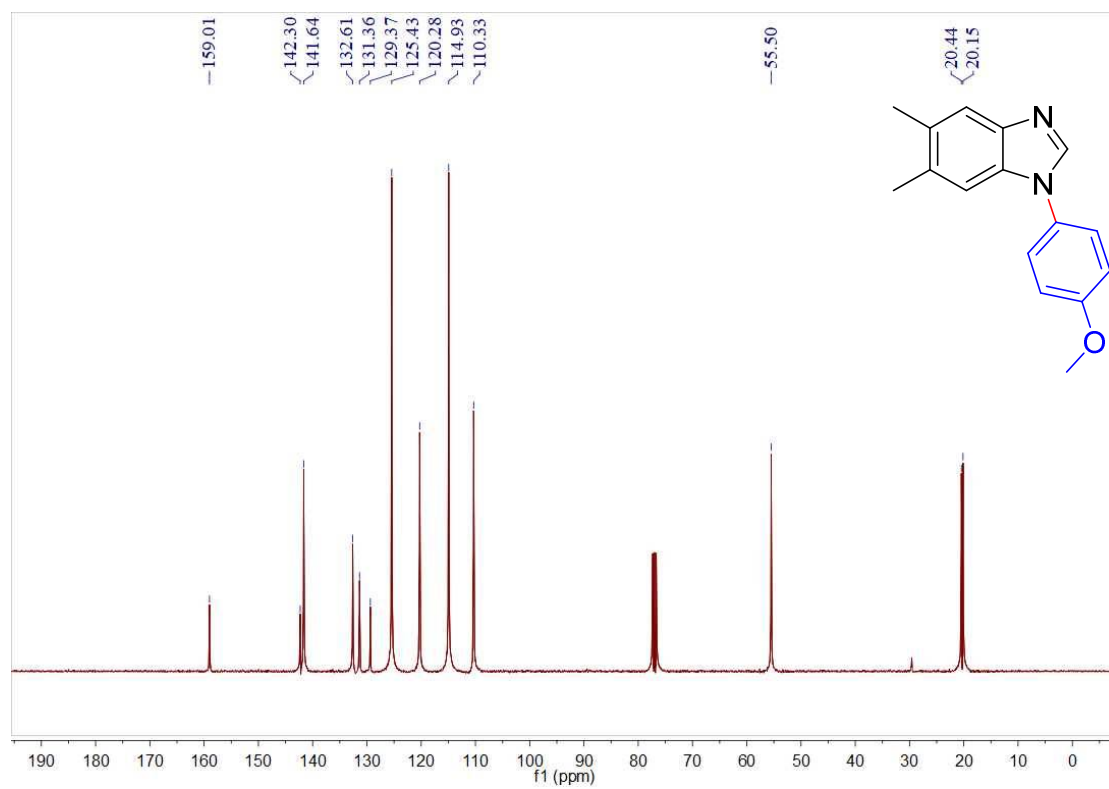

**Figure S54.**  $^{13}\text{C}\{^1\text{H}\}$  NMR spectra of **8y**
